# Supplementary material
Source: HighWire-hosted journal article supplement (http://jnnp.bmjjournals.com/highwire/filestream/197106/field_highwire_adjunct_files/0/Spanish_translation.pdf)
Supplement: Spanish_translation.pdf [file Spanish_translation.pdf]

1Sobell Department of Motor Neuroscience and Movement Disorders, UCL Institute of Neurology, Queen Square, London, UK.

2Therapy Services, The National Hospital for Neurology and Neurosurgery, Queen Square, London, UK.

3Department Clinical Neurosciences, Western General Hospital, Edinburgh, UK.

4Institute of Neurological Sciences, Southern General Hospital, Glasgow, UK.

5Therapy Services, The Ipswich Hospital NHS Trust, Ipswich, UK.

6South London & Maudsley NHS Foundation Trust, London, UK.

7Community Rehabilitation and Brain Injury Service, West Lothian, UK

8Occupational Therapist, Community Rehabilitation and Brain Injury Service, West Lothian, UK.

9Department of Clinical Neurosciences, University of Edinburgh, Edinburgh, UK.

10Institute of Psychiatry, King's College London; and the National Institute of Health Research Biomedical Research Centre at the South London & Maudsley NHS Foundation Trust and Institute of Psychiatry KCL.

**Dirigir la correspondencia a** Glenn Nielsen Box 146, Sobell Dept of Motor Neuroscience & Movement DisordersmUCL Institute of Neurology Queen Square, London WC1N 3GB, UK  
Tel +44 (0)20 3448 3718 g.nielsen@ucl.ac.uk

Para citar: Nielsen G, Stone J, Matthews A, et al. J Neurol Neurosurg Psychiatry Publicado Online Primero: [por favor incluya Día Mes Año] doi:10.1136/jnnp-2014-399255supp

***"This article has been translated and adapted from the original English-language content. Translated content is provided on an "as is" basis. Translation accuracy or reliability is not guaranteed or implied. BMJ is not responsible for any errors and omissions arising from translation to the fullest extent permitted by law, BMJ shall not incur any liability, including without limitation, liability for damages, arising from the translated text."***

Fisioterapia para trastornos motores funcionales: consenso de recomendaciones (Versión extendida).

Glenn Nielsen,<sup>1,2</sup> Jon Stone,<sup>3</sup> Audrey Matthews,<sup>4</sup> Melanie Brown,<sup>4</sup> Chris Sparkes,<sup>5</sup> Ross Farmer,<sup>6</sup> Lindsay Masterton,<sup>7</sup> Linsey Duncan,<sup>7</sup> Alisa Winters,<sup>3</sup> Laura Daniell,<sup>3</sup> Carrie Lumsden,<sup>7</sup> Alan Carson,<sup>8</sup> Anthony S David,<sup>9,10</sup> Mark Edwards<sup>1</sup>

## RESUMEN

**Introducción:** Los pacientes con trastornos motores funcionales (TMF) incluyendo la debilidad y la parálisis son derivados a los fisioterapeutas con frecuencia. Cada vez existe más evidencia de que la fisioterapia es un tratamiento efectivo, pero la literatura existente contiene descripciones limitadas acerca de en qué debe consistir la fisioterapia y no hay información suficiente para producir unas guías basadas en la evidencia. Nuestro propósito es resolver esta carencia mediante la presentación de unas recomendaciones para el tratamiento con fisioterapia.

**Métodos:** Se celebró una reunión con fisioterapeutas, neurólogos y neuropsiquiatras con extensa experiencia en el tratamiento de TMF. Se elaboró un consenso de recomendaciones basado en la evidencia existente y en la experiencia propia.

**Resultados:** Recomendamos que el tratamiento con fisioterapia se base en un marco etiológico biopsicosocial. El tratamiento debe abordar las creencias sobre la enfermedad, la atención dirigida a uno mismo y los patrones de movimientos anormales a través de un proceso de educación, reentrenamiento del movimiento y estrategias de autocuidado en un contexto positivo y exento de enjuiciamiento. Describimos ejemplos específicos de cada estrategia para los diferentes síntomas.

**Conclusiones:** La fisioterapia juega un papel fundamental en el manejo multidisciplinar de los pacientes con TMF. Parece que son ciertas técnicas fisioterápicas específicas las que son útiles en los TMF y las que son candidatas y requieren una evaluación prospectiva. Los procesos que incluyen la derivación, el tratamiento y alta a los fisioterapeutas deben considerarse cuidadosamente como parte de un conjunto de medidas para el tratamiento.

## Introducción

Muchos consideran la fisioterapia para los trastornos motores funcionales (TMF) como una parte útil del tratamiento y cada vez hay más evidencia para su uso, incluyendo un ensayo controlado randomizado.<sup>1-3</sup> Sin embargo, existe muy poca descripción, incluso en esos estudios, de en qué consiste realmente esa fisioterapia. Existe la opinión general de que cuando la fisioterapia para los TMF funciona, no sólo lo hace por “guardar las apariencias con el paciente” (otra forma de decir que los elementos precisos del tratamiento son irrelevantes puesto que la recuperación está totalmente bajo el control del paciente). Por el contrario, existe cada vez más evidencia de que el tipo de fisioterapia es importante y que una fisioterapia dirigida basada en un razonamiento lógico y basada en una comunicación transparente puede interferir en los mecanismos que producen y mantienen los TMF. Por lo tanto, nos reunimos un grupo de profesionales sanitarios multidisciplinar y geográficamente diverso para crear una serie de recomendaciones con el contenido de la fisioterapia para los TMF, que puedan actuar como guía para otros y formen la base de futuros estudios terapéuticos.

Utilizamos el término TMF para describir síntomas como debilidad, parálisis, temblor y distonía que no están causados por enfermedades neurológicas estándar. Los TMF se encuentran dentro de las causas más comunes por las que la gente solicita una valoración neurológica.<sup>4</sup> Se asocian a niveles altos de discapacidad y malestar, su pronóstico se considera malo y el gasto económico que suponen es elevado.<sup>5-7</sup>

Una encuesta reciente realizada a los neurofisioterapeutas del Reino Unido,<sup>8</sup> reveló que la mayoría (77%) veía pacientes con TMF y estaban bastante interesados en tratar pacientes con TMF. Sin embargo, identificaron como barreras para el tratamiento la falta de apoyo por parte de otros colegas no fisioterapeutas así como unas infraestructuras inadecuadas para ofrecer el servicio. Además, valoraron su conocimiento sobre el tema como bajo si lo comparaban con otras enfermedades que veían con frecuencia. Esto no es sorprendente, dada la falta de evidencia y descripciones de las técnicas de tratamiento. En una revisión sistemática reciente sobre la fisioterapia para los TMF,<sup>3</sup> se identificaron únicamente 29 estudios con un total combinado de 373 pacientes (únicamente siete estudios tenían más de 10 participantes). A pesar de las limitaciones, estos estudios muestran resultados prometedores para la fisioterapia (y rehabilitación física), con mejorías entre el 60-70% de los pacientes. Por otro lado, un estudio randomizado publicado recientemente con 60 pacientes mostró unos resultados muy alentadores de una intervención consistente en rehabilitación física en pacientes con trastorno de la marcha funcional durante un ingreso hospitalario de 3 semanas de duración (mejora de 7 puntos en una escala de 15 puntos).<sup>1</sup> Sin embargo, la literatura contiene muy poca información práctica sobre cómo llevar a cabo la fisioterapia en un individuo con TMF. No existen recomendaciones publicadas. En el presente artículo pretendemos solventar esta carencia proporcionando recomendaciones para la práctica de la fisioterapia. Introducimos el modelo fisiopatológico para los TMF en el que basamos nuestras

estrategias terapéuticas y proporcionamos sugerencias prácticas para el trayecto del paciente, desde la derivación del mismo hasta el tratamiento y el alta.

## DESARROLLO DE LAS RECOMENDACIONES

En el año 2013, un terapeuta ocupacional, fisioterapeutas, neurólogos y neuropsiquiatras, todos ellos con una extensa experiencia en el tratamiento de pacientes con TMF, se reunieron en Edimburgo, Reino Unido, para producir un conjunto de recomendaciones para el tratamiento con fisioterapia. Esto no es explícitamente una guía debido a la ausencia de evidencia disponible. Por el contrario, las recomendaciones buscan combinar la evidencia existente en la literatura<sup>13</sup> con la experiencia de profesionales de la salud en un documento que pueda formar la base de futuros estudios y pueda ser ampliado conforme la evidencia vaya surgiendo.

## MODELO DE LOS SÍNTOMAS Y BASE RACIONAL PARA LA FISIOTERAPIA

Nuestro marco etiológico es un marco biopsicosocial donde una mezcla heterogénea de factores predisponentes, precipitantes y perpetuantes son considerados y formulados, aceptando que los factores relevantes pueden diferir de unos pacientes a otros (tabla1).

Más específicamente, basamos nuestras recomendaciones para los TMF en un modelo acerca de los mecanismos de los síntomas, que pueden ser más homogéneos entre pacientes. En este modelo, los TMF se conciben como patrones de movimiento, involuntarios pero aprendidos, inducidos por un foco de atención anormalmente dirigida a uno mismo. Enfatizamos el hecho de que esto es frecuentemente desencadenado por eventos físicos o psicológicos como lesiones, enfermedades, dolor y disociación con pánico y es mediado por creencias y expectativas sobre la enfermedad.<sup>9-11</sup> Los sucesos estresantes, los trastornos emocionales y los rasgos de personalidad son relevantes a la hora de comprender y tratar algunos pacientes con TMF, especialmente en aquellos casos donde existe un nexo claro entre afecto/ansiedad y exacerbación de los síntomas. Sin embargo, nuestras recomendaciones, de acuerdo con los criterios revisados en la quinta edición del Manual Estadístico de Trastornos Mentales (DSM-5), se alejan de asumir que el “estrés reciente” y un modelo puramente psicológico son esenciales para comprender y tratar a los pacientes con TMF.

## FISIOTERAPIA COMO PARTE DE UN ABORDAJE MULTIDISCIPLINAR DE LOS TMF

La fisioterapia es una de las muchas intervenciones que pueden ayudar a los TMF. Otras incluyen la simple educación, el tratamiento psicológico, la terapia ocupacional, la logopedia, la hipnosis, los tratamientos farmacológicos y la rehabilitación vocacional. Sin embargo, recomendamos que la fisioterapia para pacientes con discapacidad física, siendo conscientes de las complejidades de los TMF, tome un papel primordial en el tratamiento de muchos pacientes. Además, sugerimos que cuando el tratamiento psicológico esté indicado, en ocasiones puede llegar a ser más efectivo si se realiza en conjunto o después de una fisioterapia exitosa.

Proponemos que la fisioterapia tiene un papel importante en normalizar las creencias sobre la enfermedad, reducir la atención focalizada en uno mismo y romper los patrones de movimiento anormales aprendidos mediante:

1. La Educación
2. La demostración de que el movimiento normal puede ocurrir
3. Reentrenando el movimiento desviando la atención
4. Cambiando los factores maladaptativos en relación a los síntomas

#### DIAGNÓSTICO, EXPLICACIÓN POR PARTE DEL MÉDICO Y DERIVACIÓN A FISIOTERAPIA

Las recomendaciones para la valoración y el correcto diagnóstico de los TMF están disponibles en otros artículos.<sup>14-15</sup> Existe un consenso entre los profesionales de la salud acerca de la importancia de una explicación clara del diagnóstico al paciente y a sus cuidadores por parte del médico<sup>16-17</sup> (detallado más adelante). Los resultados más importantes derivados de la explicación que parecen facilitar la fisioterapia son:

1. La comprensión por parte del paciente de que los profesionales de la salud implicados en su tratamiento aceptan que tienen un problema genuino (no “imaginado” o “inventado”).
2. La comprensión por parte del paciente de que su problema tiene el potencial de ser reversible (el problema es la función del sistema nervioso, no un daño en el sistema nervioso) y que por tanto puede responder a la fisioterapia.

De manera ideal, la derivación del médico a la fisioterapia para TMF debería contener una descripción de lo que se le ha dicho al paciente y lo que debe ser compartido con el paciente. Poner en conocimiento otros síntomas relevantes como el dolor, la fatiga, los problemas de memoria y concentración, la ansiedad y la depresión es importante.

No todos los pacientes con TMF son buenos candidatos para fisioterapia. Nosotros recomendamos que se cumplan los siguientes criterios:

1. Los pacientes deben haber recibido un diagnóstico sin ambigüedades por parte del médico, preferiblemente usando las recomendaciones de arriba.
2. El paciente debe tener confianza o estar abierto al diagnóstico de TMF. La fisioterapia tiene pocas probabilidades de ayudar en alguien que cree que el diagnóstico es incorrecto.
3. El paciente desea mejorar y puede identificar objetivos.

Los pacientes que no cumplen todos estos criterios también pueden beneficiarse de la fisioterapia. Por ejemplo, ayudarles a entender el diagnóstico o en el manejo de la discapacidad cuando la rehabilitación ha fallado. No todos los pacientes con un inicio agudo de los TMF requerirán tratamiento específico. Una proporción experimentarán remisiones espontáneas, pero los estudios de seguimiento han demostrado que la mayoría de los pacientes permanecerán sintomáticos a lo

largo del tiempo.<sup>6,18</sup> Dado que la cronicidad de los síntomas se relaciona con un peor pronóstico, recomendamos derivar a los pacientes adecuados pronto a fisioterapia. La pregunta de en qué cuantía una mejoría espontánea podría ser la causante del beneficio ofrecido por la fisioterapia (o cualquier otro tratamiento) es una de las que necesita responderse vía ensayos clínicos randomizados.

## VALORACIÓN FISIOTERÁPICA

Los elementos claves son: ganar comprensión en detalle de los síntomas experimentados, su efecto en el funcionamiento diario, la comprensión que tiene el paciente acerca del diagnóstico dado y su nivel de confianza en el mismo; definir los objetivos para el tratamiento fisioterápico y ganarse su confianza. Si en este estadio queda bastante claro que el paciente tiene ideas muy firmes sobre la posibilidad de diagnósticos alternativos o no desea participar en la fisioterapia, entonces puede no ser apropiado proceder. El uso de un contrato de tratamiento, como en otras patologías, puede tener beneficios a la hora de impulsar la mejoría o ayudar en el alta de pacientes que no se están beneficiando del tratamiento.

La valoración inicial puede llevar tiempo pero creemos que es importante hacerle una historia completa al paciente. Una buena valoración ayudará a establecer una buena relación y es muy probable que sea terapéutico en sí mismo. Lo siguiente es información útil que se puede extraer durante la valoración inicial.

### 1. Detalles del inicio de los síntomas y la progresión

Las circunstancias de cómo y cuándo los síntomas comenzaron pueden revelar desencadenantes físicos como una lesión, dolor, cuadro viral, migraña, fatiga o síntomas somáticos de pánico. Se puede seguir trazando la progresión de los síntomas, las pruebas solicitadas y los tratamientos previos. Preguntar al paciente que cosas estaban ocurriendo en el momento en que los síntomas comenzaron puede revelar estresantes físicos o sociales.

### 2. Lista exhaustiva de síntomas

Crear una lista de síntomas en orden de importancia relativa/preocupación del paciente.

Para cada síntoma puede ser útil tomar nota de:

- La variabilidad - ¿Cambian la severidad o la naturaleza de los síntomas? ¿En general son estables, mejoran o empeoran?
- La severidad – usando una escala análoga visual, describiéndolo con palabras, niveles de discapacidad resultante, etc.
- La frecuencia - ¿es constante o intermitente? ¿Cuántas horas al día, o días a la semana sufre los síntomas?
- Los factores que mejoran o empeoran
- Preguntar información sobre el dolor y fatiga si no se ha discutido antes. Cuando el paciente presenta dolor significativo, graduar la irritabilidad ayudar a guiar las decisiones sobre el tratamiento adecuado.

### 3. Historia social

### 4. Rutina de 24 horas

Explorar la rutina de 24 horas de los pacientes da una idea de la discapacidad, la cantidad de ayuda que requieren y los comportamientos relevantes para sus síntomas, como patrones

de exceso y ausencia de actividad, higiene del sueño deficitaria y apoyo excesivo por parte de los cuidadores.

5. Uso de apoyos externos, equipamiento y adaptaciones en domicilio
6. Limitación en actividades y restricciones en participaciones
7. Explorar el entendimiento que tiene el paciente sobre el diagnóstico.

Pregúntale al paciente qué se le ha dicho sobre su diagnóstico y qué ha entendido. Explora las creencias sobre la presencia de otras enfermedades, la necesidad de hacer más pruebas y el pronóstico. Puede ser útil preguntar al paciente si considera que los factores psicológicos son relevantes en sus síntomas.

8. Objetivos de la fisioterapia
9. Valoración física

La valoración física debe hacer especial énfasis en la realización de actividades y las habilidades funcionales (por ejemplo postura, transferencias, movilidad, patrón de marcha y función de extremidades superiores) más que en la evaluación del deterioro (por ejemplo fuerza muscular y coordinación) puesto que los resultados en la evaluación del deterioro es poco probable que se correlacionen con el grado de discapacidad. Explorar los patrones habituales de movimiento y las posturas a menudo revela comportamientos problemáticos (por ejemplo sentarse con el antepié únicamente en contacto con el suelo en temblor de extremidades inferiores o sentarse de manera prolongada con las extremidades en la “posición distónica” en la distonía fija).

La información extraída de la valoración inicial puede ser formulada en una explicación de los síntomas multifactorial para ayudar al paciente y al fisioterapeuta a comprender el diagnóstico. Esto puede incluir los factores precipitantes físicos, que pueden estar influidos por eventos sociales o procesos psicológicos y por comportamientos que mantienen los síntomas.

## EL CONTRATO DE TRATAMIENTO/ACUERDO

Siguiendo la valoración inicial y antes de comenzar el tratamiento, puede ser útil negociar los términos de un contrato de tratamiento. El contrato describe el plan de fisioterapia incluyendo el número, la duración y la frecuencia de las sesiones. Se debe informar al paciente de las políticas locales sobre el hecho de no atender a las sesiones, así como de la posibilidad de alta anticipada. Los bloques de tratamiento con tiempo limitado ayuda a promover el autocuidado, proporcionan un impulso para cambiar y aumenta la percepción del paciente sobre el valor de las sesiones, reduciendo potencialmente que no asistan a ellas.

## COMPONENTES DE LA FISIOTERAPIA

Los principios generales que se aplican en el tratamiento de la mayoría de los pacientes con TMF se muestran en la tabla 2.

Educación

El fisioterapeuta, como el médico, se encuentra en una posición excelente para mejorar la comprensión del trastorno por parte del paciente durante el tratamiento. La explicación debe ser construida a partir de la explicación dada por el médico que lo deriva. Algunos ingredientes útiles incluyen:

1. El uso del término trastorno del movimiento/debilidad de una extremidad/parálisis/temblor/distonía/mioclónica *funcional*. La base racional para preferir este término sobre “psicógeno”, trastorno conversivo u otras denominaciones se explica en otros artículos.<sup>19</sup>
2. Reconocer que los síntomas son reales, que no son imaginados o inventados (o lo que es lo mismo, que les crees).
3. Reconocer que estos síntomas son frecuentes y que el médico que les trata los ve con frecuencia.
4. Explicar que los síntomas pueden mejorar, que el problema tiene que ver con el funcionamiento del sistema nervioso y no con un daño irreversible del sistema nervioso.
5. Explicar cómo los TMF se diagnostican usando signos clínicos positivos que demuestran que el movimiento normal es posible (ver más abajo).
6. Explicar que existe una variedad importante de factores que pueden estar implicados en desencadenar los síntomas, incluyendo enfermedades físicas y lesiones, y que factores psicológicos como la ansiedad, depresión y traumas pueden ser también relevantes.
7. Introducir el papel de la fisioterapia como “reentrenamiento” del sistema nervioso para ayudar a ganar control sobre el movimiento.
8. Puede ser importante discutir otros términos que se usan para denominar a los TMF y el hecho de que muchos profesionales de la salud tienen actitudes ambivalentes o negativas sobre los TMF.

Esta información debe reforzarse con información escrita u online (por ejemplo <http://www.neurosintomas.org>). En los pacientes en los que las dudas sobre el diagnóstico persisten, éstas a menudo mejoran si la terapia progresa de manera exitosa. Ver tabla 3 más adelante para algunos ejemplos de cómo comunicarse con los pacientes (disponible sólo en la versión online).

#### SIGNOS POSITIVOS DE LOS TMF QUE DEMUESTRAN POTENCIAL PARA EL MOVIMIENTO NORMAL

La demostración de que el movimiento normal puede ocurrir (o que el movimiento anormal puede cesar) altera las expectativas sobre el trastorno del movimiento, y puede ser una forma eficaz de convencer a un paciente escéptico (y a su familia) de que el diagnóstico del TMF es correcto y el problema es potencialmente reversible.<sup>20</sup> Se han descrito diferentes signos clínicos que muestran el movimiento normal y diferencian a los síntomas funcionales de otras enfermedades neurológicas. Éstos se usan como parte del diagnóstico para identificar a los TMF de manera positiva, en vez de que sean un diagnóstico de exclusión. Algunos de esos signos se enumeran en la tabla 4.



## REENTRENAR EL MOVIMIENTO DESVIANDO LA ATENCIÓN

El reto para los fisioterapeutas es demostrar movimiento normal en el contexto de una actividad significativa como es caminar. La clave es minimizar la atención focalizada en uno mismo mediante la distracción o evitando que el paciente controle cognitivamente el movimiento y estimulando los movimientos generados de manera automática. Esto se puede llevar a cabo alterando el foco de atención motora, como pensar en una parte diferente del movimiento o intentado movimientos rápidos, rítmicos, no familiares o impredecibles.

La distracción puede ocurrir a nivel cognitivo, por ejemplo, trasladando la atención lejos del miembro afecto con conversación, música o tareas mentales mediante la aritmética. Sin embargo, se prefieren los ejercicios orientados a tareas específicas (tabla 5) porque a menudo son más efectivos, se traducen directamente en una mejoría funcional y fomentan el control motor implícito. Se pueden generar movimientos automáticos significativos y actividad muscular sujetando peso, con respuestas posturales automáticas como sentándose en superficies inestables (por ejemplo, la terapia con balones). En la tabla 5 se incluyen más sugerencias de como demostrar movimiento normal en diferentes situaciones y técnicas específicas para síntomas individuales.

## OTRAS ESTRATEGIAS DEL TRATAMIENTO CON FISIOTERAPIA

### Uso del lenguaje

Usar un lenguaje adecuado puede ser importante. Las explicaciones que eliminan eficazmente la culpa, el fallo o la implicación de la voluntariedad son útiles. Por ejemplo: “tu cerebro está monitorizando tu cuerpo de un modo anormal”, o “las pruebas han mostrado que tus músculos tienen la capacidad de moverse”, en vez de “puedes mover tus músculos.”

Las palabras usadas al pedirle al paciente que se mueva también pueden ser importantes. El lenguaje puede desencadenar movimiento automático, por ejemplo, “permite a tu pierna que venga hacia adelante” puede producir movimiento mejor que “da un paso/mueve tu pierna hacia adelante.” Durante las sesiones de fisioterapia, uno puede ir encontrando pistas o mensajes de lo que es más útil para cada paciente.

### Ejercicio – no específico y graduado

Se debe considerar el ejercicio graduado y no específico como parte de cualquier programa de rehabilitación general para mejorar la intolerancia al ejercicio y los síntomas de dolor crónico y fatiga. Hay cierta evidencia para ello en los TMF.<sup>21</sup> El éxito aquí depende de conseguir la intensidad correcta para prevenir la exacerbación de los síntomas y promover el cumplimiento y la adherencia al programa. Estudios randomizados de gran tamaño muestral han demostrado que el ejercicio graduado mejora los resultados en pacientes con fatiga crónica<sup>22</sup>-un acompañante frecuente de los TMF (ver más adelante)- y es muy probable que sea beneficioso para muchos pacientes.

## Visualización

Algunos pacientes pueden encontrar útil las técnicas de visualización durante el movimiento. Esto puede que funcione como una forma de distracción donde el paciente imagina una tarea motora más fluida o un escenario más agradable mientras se encuentra realizando los ejercicios. La visualización puede ser contraproducente si fomenta el foco de la atención sobre uno mismo durante el movimiento.

## Espejos y video

Los espejos y el uso del video pueden ser de ayuda proporcionando retroalimentación a los pacientes acerca de sus movimientos, posturas o patrones de la marcha que a menudo difieren significativamente de cómo ellos imaginan que son.<sup>23</sup> Moverse en frente de un espejo puede ayudar también a distraer la atención para dejar de monitorizar sensaciones corporales.

## Hipersensibilidad y alodinia

Las intervenciones dirigidas a la desensibilización pueden ser apropiadas cuando la hipersensibilidad y la alodinia están presentes. Éstas pueden incluir la estimulación sensorial graduada, los ejercicios/movimientos graduados y la electroestimulación transcutánea de los nervios (TENS).

## Diario de rehabilitación o libro de trabajo

Completar un diario de rehabilitación o libro de trabajo con la ayuda del fisioterapeuta puede ser una técnica útil para ayudar al paciente a reflexionar, recordar y reforzar la información ofrecida durante la fisioterapia. El paciente puede usar el diario para realizar un seguimiento de sus objetivos, medidas de resultados y logros, las estrategias de tratamiento, el plan de actividades, etc. Un diario puede ser de ayuda para mejorar el cumplimiento del tratamiento, y estimular la responsabilidad para el autocuidado.

## Manejo del dolor y de la fatiga

El dolor y la fatiga persistente o crónica son frecuentes en los pacientes con TMF y a menudo tienen un papel en precipitar y mantener los síntomas. Preferiblemente, el paciente debe entender que esos síntomas se engloban dentro de un solo problema (con muchos síntomas) y no son enfermedades separadas. El núcleo de los tratamientos para el dolor y la fatiga basados en la evidencia, como se sugiere para los TMF son, (1) el cambio en las creencias sobre la enfermedad de ser secundaria a un daño a ser potencialmente reversible; (2) reconocer que el dolor crónico no se correlaciona con daño y 3) cambiar los factores maladaptativos, tales como romper los ciclos de exceso y ausencia de actividad con ejercicio graduado. Puede ser útil reformular el dolor como otro

ejemplo de que el sistema nervioso está enviando señales incorrectas, como los TMF, y pueden mejorar mediante el reentrenamiento (esto es, estableciendo una retroalimentación sensitivo-motora más normal). Existen guías basadas en la evidencia de buena calidad y recursos útiles para pacientes para la educación en el manejo del dolor.<sup>24-25</sup>

#### Provisión de equipamiento, ayudas adaptativas, férulas o escayolas

Recomendamos evitar ayudas adaptativas siempre que sea posible, especialmente en las presentaciones agudas. La provisión de un equipamiento y de ayudas adaptativas puede favorecer formas de funcionar y conductas que dificultan el retorno del movimiento normal y resultan en cambios secundarios como debilidad y dolor.

En algunos casos, el uso de equipamiento es necesario por razones pragmáticas (asegurar la seguridad después de lesiones comprobadas), en cuyo caso deben considerarse temporales y ofrecer un plan para ir disminuyendo su uso. Recomendamos asegurarse de que el paciente comprende los efectos potencialmente nocivos del equipamiento y se debe establecer un plan para minimizarlo (por ejemplo, asegurar que el paciente con una silla de rueda tiene la oportunidad de levantarse tanto como sea seguro y posible). Para pacientes con TMF que no han respondido al tratamiento, un equipo adaptativo puede mejorar la independencia y la calidad de vida y debe ser considerado.

Recomendamos con fervor evitar la inmovilización del paciente con férulas, escayolas o dispositivos similares. En un estudio sobre la distonía fija (funcional) (n=103), un 15% desarrollaron el problema o éste se deterioró significativamente durante o después de una inmovilización con escayola. En ningún caso la inmovilización con escayola resultó en una mejoría duradera.<sup>26</sup>

#### Electroterapias- estimulación eléctrica funcional, biorretroalimentación con EMG, estimulación magnética transcraneal y TENS

El uso de la electricidad en el tratamiento de los TMF viene de lejos y se remonta al siglo diecinueve.<sup>27 28</sup> No recomendaríamos ninguna de esas terapias como tratamiento aislado. La electroestimulación funcional (FES) puede ser un tratamiento adyuvante útil, particularmente en pacientes con trastorno de la marcha funcional.<sup>29</sup> Idealmente, la FES debería utilizarse como una modalidad terapéutica y no como una ayuda permanente para la movilidad. La estimulación muscular eléctrica (no necesariamente la FES) puede utilizarse para demostrar el movimiento normal y cambiar las creencias sobre la enfermedad. Puede funcionar también a nivel de reaprendizaje motor.

La biorretroalimentación con electromiografía (EMG) se puede usar para abordar las creencias sobre la enfermedad y puede ser útil para entrenar el movimiento en la debilidad funcional<sup>30</sup> o la relajación muscular en el temblor o las posturas fijas.

Estudios recientes con estimulación magnética transcraneal (TMS) ofrecen algunos resultados prometedores.<sup>31</sup> Sin embargo, ninguno de los estudios publicados fueron controlados y ninguno

incluía una exposición a protocolos de TMS que pudieran considerarse como neuromoduladores. Lo más probable es que el efecto placebo y la sugestión jueguen un papel importante en los pacientes donde el tratamiento es exitoso, aunque la TMS puede jugar un papel específico, como la hipnosis o la sedación terapéutica,<sup>32 33</sup> en ser capaces de demostrando movimiento en extremidades que no pueden moverse de otro modo.<sup>34</sup> La TMS, como la FES, pueden ser por tanto técnicas adicionales útiles para algunos pacientes, y que fisioterapeutas especializados podrían incorporar en su práctica clínica.

La TENS, capaz de producir una sensación de hormigueo sin dolor o contracción muscular, ha sido descrita como tratamiento para los pacientes con TMF.<sup>35</sup> Nosotros hemos utilizado máquinas de TENS en pacientes con anestesia funcional o hipoestesia marcada subiendo la intensidad de los estímulos a niveles altos para que se hagan más conscientes de la sensación.

### Caídas y conductas autolesivas

Se considera con frecuencia que las caídas en los pacientes con TMF tienen un riesgo bajo de lesión, en particular el patrón frecuente de “descensos controlados”. Cuando éste es el caso, se debe informar al personal de esta posibilidad y puede ser conveniente para el paciente tomar un riesgo (aparentemente) mayor. La situación es más compleja cuando existe una historia de autolesión que a veces se puede manifestar como una caída. El riesgo de lesión durante las sesiones de fisioterapia es más alto. En este caso, las decisiones clínicas se deben tomar con el apoyo de un equipo multidisciplinar (MDT). El fisioterapeuta puede ayudar a manejar esta situación adelantándose al riesgo de lesiones por caídas, documentar las discusiones y las decisiones clínicas in la historia clínica y animando al paciente a sentirse parte de la toma de decisiones.

## INFORMACIÓN ESPECÍFICA PARA CADA SÍNTOMA

### Trastorno de la marcha funcional

En la tabla 5 hemos enumerado algunas estrategias que pueden ser útiles para ayudar a reentrenar la marcha. Además, una evaluación cuidadosa puede identificar factores contribuyentes susceptibles de un enfoque de una fisioterapia que incluye la educación y el reentrenamiento del movimiento. Algunos ejemplos incluyen patrones de movimiento antálgico, fatiga y mialgia, miedo a las caídas asociados con síntomas somáticos de pánico y excesivo peso sobre las extremidades superiores a través de ayudas para caminar.

El reentrenamiento de la marcha puede abordarse de varias maneras, por ejemplo con soporte facilitado (con las manos) en sustitución de las ayuda para caminar. El apoyo con las manos se va reduciendo gradualmente a medida que la confianza mejora, preferiblemente sin que el paciente sea muy consciente de ello. Fomentar del uso de apoyo táctil ligero sobre el entorno puede ser utilizado como una alternativa al uso de ayudas para caminar. El reentrenamiento de la marcha puede practicarse de forma progresivamente en ambientes cada vez más difíciles como en el exterior, en superficies irregulares y entornos abarrotados. Esto puede ser particularmente importante cuando el miedo a caer sea significativo.

Cambiar la velocidad de la marcha puede ayudar a normalizar el movimiento. Un patrón de caminar caracterizado por una lentitud excesiva y atención al movimiento, puede mejorar si se anima a acelerar. Por el contrario, algunos pacientes (por ejemplo, aquellos con movimientos temblorosos o con hiperactividad muscular) responderán mejor a la desaceleración y la velocidad se trabajará más tarde como otro objetivo de la rehabilitación.

En la literatura se ha descrito un enfoque para la readaptación de la marcha donde se requiere que el paciente domine una serie de maniobras prescritas. Cada etapa de la serie se va aproximando a la marcha normal progresivamente y no se permite avanzar al paciente a la siguiente etapa hasta que la etapa actual queda dominada y las etapas anteriores siguen siendo ejecutadas de forma efectiva.

36-39

Este enfoque puede ser útil en algunos pacientes, como aquellos cuyos síntomas son muy resistentes al cambio. Sin embargo generalmente no recomendaríamos un enfoque tan rígido en la fisioterapia. Este enfoque de rehabilitación también implicó confinar al paciente a una silla de ruedas para evitar el refuerzo negativo de los síntomas. Esto es algo que no defendemos.

## Debilidad

Hay poco o ningún valor en los ejercicios de fortalecimiento para la debilidad funcional ya que el problema no es fundamentalmente de debilidad muscular sino de control de movimiento. Ejercicios de fortalecimiento de músculos específicos tienden a estimular el movimiento con la atención focalizada en uno mismo y explícitamente controlado y, por lo tanto, a exacerbar los síntomas funcionales. Las tareas deben estar orientadas a objetivos, como caminar, hacer transferencias y beber de una taza.

Los movimientos del cuerpo entero en un ambiente seguro que incluye soporte del peso sobre las extremidades superiores y las extremidades inferiores pueden ser útiles, como moverse de supino a sentarse a arrodillarse sobre 4 puntos, a una posición de rodillas sobre dos puntos. Aguantar el peso a través de una extremidad activará automáticamente los músculos estabilizadores proximales de la cadera y del hombro que el paciente puede no ser capaz de acceder cuando se prueba por separado.

Debe alentarse al paciente que ha estado usando una silla de ruedas o soportando el peso a través de unas muletas a mantenerse de pie incluso si creen que esto no será posible. Se les puede recordar que el objetivo es fomentar los movimientos automáticos. Se les puede decir que inicialmente su marcha puede ser peor de lo que es con muletas. Es evidente que esto debe realizarse en un entorno seguro y protegido y el rendimiento se verá afectado negativamente si el paciente se siente inseguro.

Caminar con apoyo facilitado, evitando que el paciente aguante un peso excesivo a través de soportes puede ser útil para crear confianza. El apoyo "con las puntas de los dedos" en las extremidades superiores o en las rodillas del paciente con el terapeuta de pie cerca puede proporcionar confianza y apoyo psicológico. El paciente debe ser animado a mirar hacia adelante y definitivamente no a la extremidad(es) afectada(s). Mantener el contacto visual con el paciente puede ayudar a evitar que observen su cuerpo. Manejar el riesgo de caídas es un tema complejo y lo discutiremos por separado más adelante.

## Temblor funcional

El temblor funcional suele estar generado por la co-contracción muscular o de una manera similar al temblor voluntario con activación alternante de agonistas y antagonistas alrededor de una articulación.

Los pacientes a menudo perciben que su temblor es continuo, sin embargo éste raramente es el caso. Un experimento reciente demostró que los pacientes sobreestiman dramáticamente la presencia del temblor funcional en comparación con las mediciones de un reloj de temblor.<sup>40</sup> Se hipotetizó que cuando el paciente no estaba atendiendo a su temblor, el temblor cesaba. Cualquier intervención que reduzca la presencia del temblor ayudará limitando el refuerzo del patrón de movimiento o comportamiento, esencial para romper el hábito.

Un punto de partida para la fisioterapia puede ser ayudar al paciente a explorar y desarrollar estrategias que controlen o detengan el temblor, en el cuadro 5 figuran algunas ideas concretas. Estas estrategias pretenden interferir con el temblor por distracción y / o por una competencia de movimiento. Estrategias como éstas pueden ayudar a los pacientes a desarrollar un sentido de control o agencia sobre el movimiento, sin las cuales pueden llegar a adoptar estrategias de copia pasivas y poco útiles. Usar estrategias para controlar un temblor funcional suele requerir práctica y puede no tener éxito en los intentos iniciales. La retroalimentación visual con un espejo es a menudo útil para establecer el control.

La fisioterapia también debe considerar y desalentar las posturas y los patrones de movimiento que pueden exacerbar el temblor. Una presentación común en el temblor funcional ocurre cuando el paciente se sienta contactando el antepié con el suelo, desencadenando un temblor de la extremidad inferior a través de un mecanismo de clonus. En este caso, cambiar la postura de los miembros inferiores para que el talón y el antepié estén en contacto con el suelo puede detener el movimiento. Con frecuencia los pacientes intentan controlar el temblor aumentando la tensión en sus músculos (por ejemplo apretando un puño). Esto tiende a no ser una solución útil ya que el temblor funcional es principalmente un problema de sobre-activación muscular y de la incapacidad para relajar los músculos a voluntad. Puede tener valor desarrollar tratamientos usando la biorretroalimentación con EMG para enseñar al paciente cómo relajar sus músculos. Poner como objetivo los músculos proximales al temblor puede ayudar a reducir la atención contraproducente hacia la extremidad temblorosa.

## Distonía funcional

La distonía funcional suele asociarse con niveles importantes de dolor y suele solaparse con el diagnóstico de síndrome de dolor regional complejo tipo 1.<sup>26</sup> Los pacientes típicamente presentan posturas fijas de las extremidades y las contracturas articulares pueden convertirse en la mayor fuente de discapacidad. Si la posición de la extremidad es fija, una evaluación bajo anestesia es útil para determinar el rango de movimiento disponible que puede influir en los objetivos inmediatos de fisioterapia. Si se realiza un examen bajo anestesia, entonces debe ser usado como una oportunidad para demostrar la reversibilidad de la posición al paciente (mediante grabación de vídeo o realizando

el procedimiento bajo anestesia ligera).<sup>23, 33</sup> Muchos pacientes con distonía fija explican una posición diferente (por lo general más normal) de la extremidad afectada (o una ausencia de la extremidad) con los ojos cerrados. Esta observación puede ser compartida con el paciente para enfatizar que hay un problema con el mapa de la extremidad en el cerebro, y que el problema no reside en la propia extremidad.

Los tratamientos que implican la inmovilización de la articulación en moldes y férulas pueden ser perjudiciales.<sup>26</sup> De igual manera es probable que con los estiramientos pasivos y el movimiento explícitamente controlado se aumente la atención centrada en uno mismo y que se exacerben el problema. El tratamiento debe centrarse en el reentrenamiento de las posturas maladaptativas, los patrones de movimiento y la sobre-actividad muscular que contribuyen a la postura fija durante la rutina de 24 horas del paciente. Un aspecto común que debe abordarse es la postura habitual al sentarse en la posición distónica, por ejemplo, sentarse de forma prolongada con las articulaciones de los miembros inferiores en posiciones extremas (por ejemplo, flexión plantar del tobillo e inversión). Estas son a menudo posiciones de confort o de sentirse "normal" para el paciente y el terapeuta debe convencer al paciente que en realidad son contraproducentes y son la causa de la contractura.

La normalización del movimiento estirará los músculos sin la atención indebida y limitará la co-contracción muscular contraproducente vía inhibición recíproca. La sobreactividad muscular puede ocurrir como una respuesta protectora al dolor o como comportamiento aprendido en ausencia de dolor. Con el tiempo la sobreactividad muscular prolongada acelerará el acortamiento muscular y causará contracturas en la articulación. El tratamiento incluye la educación del paciente y el reemplazo de los movimientos y las posturas maladaptativas con alternativas terapéuticas prácticas que permiten que los músculos más activos se relajen. En la mayoría de los casos, abordar el dolor con los principios del dolor crónico será importante. Las áreas de hipersensibilidad deben ser desensibilizadas a través de una exposición gradual a la sensación normal y el movimiento. Por ejemplo con el uso de calcetines y zapatos, soporte del peso corporal simétrico y normalizando las posturas de sentado y de pie.

### Espasmos/ Mioclonías funcionales

El tratamiento de los síntomas intermitentes puede ser un reto. Indagar en cómo se inician los síntomas puede revelar una historia de dolor o lesión. El tratamiento puede incluir el reconocimiento y el abordaje de los factores precipitantes como el aumento de la atención enfocada a uno mismo antes del espasmo, dolor, sobre-actividad muscular, patrones alterados de movimiento y postura alterada. Si no se puede identificar factores precipitantes que sean susceptibles a la fisioterapia, puede ser que el paciente sea más idóneo para un abordaje con terapia cognitivo-conductual, la cual puede centrarse en los síntomas premonitorios o abordar el problema como un "hábito" que necesita ser desaprendido. En aquellos pacientes que tienen síntomas premonitorios, el espasmo, aunque indeseable puede también producir una sensación temporal de alivio de estos síntomas o dar una sensación de "liberación de tensión". Comprender esto puede ser útil para explicar al paciente por qué desarrolló en primera instancia el «hábito» y encontrar otras formas de tratar los síntomas premonitorios.

## TÉCNICAS QUE NO RECOMENDAMOS

Existen ciertos abordajes para la rehabilitación descritos en la literatura que aconsejamos no utilizar como terapias de primera línea. Estos son:

1. Engañar al paciente de cualquier manera. Por ejemplo, decirle al paciente que la falta de recuperación significa que los síntomas son imaginarios<sup>36</sup> incluyendo el uso de tratamiento con placebos engañosos.
2. Confinar al paciente a una silla de ruedas fuera de las sesiones de terapia mientras el patrón de la marcha permanezca afectado por los síntomas funcionales.<sup>37</sup>
3. Manejar los síntomas funcionales con cirugía. Los procedimientos quirúrgicos han sido reportados como precipitante frecuentes de los TMF.<sup>10 26</sup>

Algunos pacientes con distonía fija funcional buscan ser amputados, lo que normalmente resulta en empeoramiento de los síntomas.<sup>42</sup> La cirugía con alargamiento de tendones podría tener un papel en los casos donde existan contracturas fijas confirmadas tras evaluación bajo anestesia; sin embargo, esto se acompaña del riesgo de exacerbar los síntomas funcionales y de dolor crónico.

## PARÁMETROS DEL TRATAMIENTO

Se desconocen el marco, la duración y la intensidad óptima del tratamiento y parece probable que éstos varíen en relación a la severidad, cronicidad y posiblemente a la presentación/fenotipo de los síntomas. Los programas que requieren un ingreso hospitalario permiten que los factores sociales y ambientales que pueden estar implicados en desencadenar o mantener los síntomas se reduzcan y permite tratamientos de mayor intensidad. El tratamiento domiciliario puede abordar los problemas reales a los que el paciente se enfrenta una vez es dado de alta, que pueden resultar en un empeoramiento de los síntomas. Los programas que requieren una atención ambulatoria tienen las ventajas de poder proveer el servicio durante un período de tiempo más largo. Un abordaje en forma de “cuidados escalonados” es la situación ideal, donde la complejidad del tratamiento puede escalarse dependiendo de las necesidades del paciente.<sup>43</sup>

En ausencia de evidencia para parámetros específicos para los TMF, parece razonable tener en cuenta las guías de rehabilitación para trastornos similares. El National Institute for Health and Care Excellent (NICE) en el Reino Unido recomienda ofrecer a los pacientes con dolor lumbar hasta 8 sesiones de un programa adaptado estructurado de ejercicios de 12 semanas. Recomiendan que el tratamiento pueda escalarse a un programa combinado físico y psicológico que conste de 100 horas en un máximo de 8 semanas.

## TERAPIA DE GRUPO

Existía poca experiencia en terapia de grupo entre los profesionales de la salud involucrados en este documento y no existe evidencia publicada. La terapia de grupo puede ser beneficiosa para pacientes seleccionados al compartir las experiencias poco habituales de tener TMF. Sugeriríamos



que si se usan grupos, estos tienen que estar moderados cuidadosamente por alguien con experiencia en grupos de tratamiento. Para la mayoría de los pacientes, un tratamiento individualizado es preferible dada la naturaleza heterogénea de los TMF.

## MEDIDAS DEL RESULTADO

Ésta es una pregunta sin resolver en los estudios de los TMF. Se han usado cambios en la discapacidad (por ejemplo, usando la Escala de Independencia Funcional),<sup>37 38 45 46</sup> calidad de vida (por ejemplo, la SF-36), la impresión clínica global (escala de 5 puntos)<sup>2 47</sup> y el coste-beneficio. Las escalas objetivas que se usan en investigación para los TMF, como la Escala de evaluación de los Trastornos del Movimiento Psicógenos,<sup>48</sup> tienen un valor cuestionable tanto en la práctica clínica como en investigación debido a que los síntomas de los TMF son muy variables. En la tabla 6 se listan algunas medidas de resultados usadas frecuentemente y potencialmente útiles.

## ALTA Y SEGUIMIENTO/FINALIZACIÓN DEL TRATAMIENTO

Acordar el proceso de alta al inicio del tratamiento (contrato/acuerdo de tratamiento) es útil ya que ayuda a ambas partes a planificar la finalización del tratamiento y limita los problemas que potencialmente pueden asociarse. Se debe elaborar un plan de autocuidado que incluya estrategias y ejercicios que hayan sido de ayuda durante la terapia, objetivos futuros con marcos temporales realistas y estrategias para prevenir que conductas no beneficiosas aparezcan de nuevo (por ejemplo, programar actividades de manera graduada, planificar el ejercicio para evitar ciclos de exceso y ausencia de actividad física). Los contratiempos y las recaídas de los síntomas después del tratamiento son comunes y es importante que el paciente esté preparado para ello. Una visita de seguimiento unos meses tras el alta puede ser beneficiosa para revisar y reajustar los objetivos así como para solucionar problemas que hayan podido aparecer.

Un informe de alta para el paciente, para el médico de familia y para otros médicos relevantes puede tener un valor terapéutico si se utiliza como una oportunidad para reforzar la información que se le ha dado al paciente y para educar a otros en el diagnóstico y en el tratamiento.

## TMF Y LA COMORBILIDAD PSIQUIÁTRICA

La comorbilidad psiquiátrica asociada es generalmente más frecuente en el grupo de los TMF que en la población general. Para algunos pacientes, la comorbilidad psiquiátrica puede estar presente y ser relevante al inicio de los TMF y requiere un tratamiento psiquiátrico específico. Puede ser necesario que éste se realice antes (por ejemplo, cuando el individuo tiene riesgo de autolesionarse o es reacio a involucrarse en la rehabilitación física), durante o después de la fisioterapia. Nuestra experiencia es que la psicoterapia (en particular, el tratamiento para la ansiedad y depresión) es a menudo más exitosa una vez se haya producido cierta mejoría durante la fisioterapia.

## LIMITACIONES

Este documento tiene como objetivo abordar el problema de la falta de información y evidencia para los fisioterapeutas que tratan pacientes con TMF. Somos conscientes de que existen varias limitaciones en estas recomendaciones. La más significativa es que están basadas en evidencia limitada. Nuestro objetivo es únicamente ofrecer consejo para fisioterapeutas. Coincidimos en que la fisioterapia es sólo una parte del tratamiento multidisciplinar, y que otras disciplinas como la terapia ocupacional o las terapias psicológicas pueden tener un papel igual o mayor en determinados pacientes. Los pacientes con TMF forman parte de un grupo heterogéneo y cada paciente tendrá factores únicos que contribuyan a sus síntomas.

## CONCLUSIÓN/RESUMEN

Los TMF son complejos y su etiología es multifactorial. Los pacientes con este diagnóstico por consiguiente son también heterogéneos. El tratamiento debe reflejar esto también. La fisioterapia dirigida a restablecer el movimiento y la función ha demostrado validez, empieza a estar basada en la evidencia y es bien aceptada por los pacientes. Actualmente, se emplean recursos para la fisioterapia en pacientes con TMF, sin embargo no existen infraestructuras ni información para que los fisioterapeutas puedan planificar el tratamiento. El modelo biopsicosocial y las recomendaciones que presentamos están dirigidas a ayudar a los fisioterapeutas para planificar tratamientos individualizados que aborden el problema que contribuye en los síntomas del paciente. Un abordaje en forma de cuidados escalonados es importante para poder escalar el tratamiento cuando sea necesario.

## PREGUNTAS FRECUENTES

### **El paciente está aún muy enfadado o no tiene claro el diagnóstico. Parece que no puedo convencerle acerca del diagnóstico. ¿Qué debo hacer?**

Parece razonable intentar convencer al paciente un par de veces del diagnóstico usando los pasos descritos anteriormente, incluyendo la información por escrito. Sin embargo, si después de esto, el paciente sigue pensando que el diagnóstico es erróneo, lo más apropiado puede ser suspender el tratamiento (ver Tabla 3. Ejemplo de cómo decirlo). Es importante para todos comprender que tener confianza en el diagnóstico no conlleva en sí mismo una mejora. Pero las técnicas que un fisioterapeuta querrá probar estarán entorpecidas en un paciente que está preocupado por si no ha sido diagnosticado correctamente. Por ejemplo si un ejercicio en particular produce dolor o conlleva un riesgo potencial de caída. El fisioterapeuta debe comunicar el problema al médico que lo deriva para valorar si más visitas con el médico pudieran ayudar a cambiar las cosas.

### **¿Se caen los pacientes con TMF durante el tratamiento? Y si se caen ¿se lesionan? ¿y qué ocurre con las conductas autolesivas?**

Con frecuencia se considera que las caídas en los pacientes con TMF tienen un riesgo bajo de lesión, en particular el patrón frecuente de “descensos controlados”. Cuando éste es el caso, se debe informar al personal de esta posibilidad y puede ser conveniente para el paciente tomar un riesgo (aparentemente) mayor. La situación es más compleja cuando existe una historia de autolesión que a veces se puede manifestar como una caída. El riesgo de lesión durante las sesiones de fisioterapia es más alto. En este caso, las decisiones clínicas se deben tomar con el apoyo de un equipo multidisciplinar (MDT). El fisioterapeuta puede ayudar a manejar esta situación adelantándose al riesgo de lesiones por caídas, documentar las discusiones y las decisiones clínicas en la historia clínica y animar al paciente a compartir la responsabilidad en la toma de decisiones.

### **¿Cómo se alcanza el equilibrio entre avanzar en la movilidad y el riesgo de caídas?**

Sugerimos ser explícitos con el paciente acerca de la necesidad de tomar ciertos riesgos para poder progresar y proceder cuando ellos lo deseen.

### **¿Cómo se manejan los pacientes que tienen síntomas intermitentes? (Síntomas que puede que no estén presentes durante la sesión de fisioterapia).**

Una evaluación exhaustiva puede ayudar a identificar conductas, patrones de movimiento o posturas que pueden exacerbar los síntomas u otros problemas relevantes como el dolor crónico y la hipervigilancia. El tratamiento puede consistir en la educación y el desarrollo de un plan de manejo de los síntomas para abordar esos aspectos. Si en la evaluación no se ha podido identificar ningún problema que creas que puede ser susceptible a fisioterapia, es posible que el paciente sea mejor candidato a otros tratamientos (como la terapia ocupacional, la terapia cognitivo conductual y otras terapias psicológicas). Si se considera apropiado, puede ser posible provocar los síntomas (por ejemplo con movimientos o ambientes concurridos) y practicar en ese momento las técnicas.

### **¿Qué debo hacer si creo que mi paciente está simulando?**

Esta es una de las preocupaciones más antiguas para los pacientes y los médicos que batallan con los TMF. No es sorprendente, dado que los síntomas se originan en el sistema nervioso voluntario y se diagnostican usando pruebas que son positivas igualmente para pacientes que simulan síntomas motores. Sólo se puede obtener evidencia clara de simulación si existe una diferencia marcada entre lo que el paciente dice que puede hacer y lo que se observa que pueden hacer. La discrepancia en el movimiento NO es evidencia de simulación – de hecho ésta es la manera en la que se hace el diagnóstico de TMF. Si un paciente parece estar mejor mientras no es observado puede ser sólo que experimenta sus síntomas sobre todo cuando piensa en ellos, y son menos pronunciados cuando no lo hacen.

Los estudios de seguimiento, la homogeneidad de los síntomas y la consistencia de los síndromes, las descripciones de los pacientes sobre los aspectos disociativos de sus síntomas, así como las

marcas en sus zapatos y en el equipamiento ofrecen evidencia de la naturaleza genuina de los TMF en la vasta mayoría de estos pacientes.

### **¿Pueden ser elegidos para subsidios los pacientes con TMF? ¿Qué ocurre si se me pide hacer un informe para solicitar un subsidio o para el seguro del trabajo?**

El acceso a los subsidios por discapacidad debe basarse fundamentalmente en el tipo de síntomas que el paciente padece y en la discapacidad resultante y no en el diagnóstico que tiene. Las compañías aseguradoras pueden preguntar por información adicional, pero el informe sobre los síntomas que el paciente tiene y el diagnóstico debe realizarse del mismo modo que sería hecho para síntomas de cualquier otra causa neurológica.

### **¿Cómo puedo manejar una recaída?**

Una recaída de los síntomas es más común que una recuperación franca. Para la mayoría de los pacientes es útil anticiparles que en algún momento tendrán una recaída. Se les puede decir que la recuperación de un TMF normalmente implica una serie de recaídas, pero con una mejora progresiva de fondo. Merece la pena comentar como se sentirá y responderá el paciente cuando recaiga, anticipándose con una respuesta diferente a la que el paciente tenía antes de que supiera cuál era su diagnóstico. Una recaída es una oportunidad para reevaluar potenciales desencadenantes físicos o psicológicos y obstáculos que dificulten la mejoría. Es útil planear por adelantado cómo sería la propuesta adecuada por parte de los cuidadores y los profesionales de la salud manejando la recaída. Por ejemplo, ser trasladado de urgencias a un hospital a menudo conlleva a una mayor duración de la recaída que si el paciente puede manejarlo en la intimidad en casa. En algunos casos la recaída puede indicar que es necesario escalar el tratamiento, por ejemplo a un tipo más formal de rehabilitación multidisciplinar.

### **¿Qué debo hacer si creo que mi paciente tiene un TMF pero no se le ha dado el diagnóstico?**

Los fisioterapeutas han comunicado que a menudo se les deriva pacientes con TMF sin que el diagnóstico se haya discutido con el propio paciente, bien porque el médico no sabía que éste era el diagnóstico o bien porque no supieron comunicarlo de forma adecuada.<sup>8</sup> Ésta es una situación difícil tanto para el terapeuta como para el paciente. En este caso, sugerimos que el fisioterapeuta debe escribir al médico responsable, pidiendo si es posible clarificar el diagnóstico, explicando que esto cambiará el abordaje y la efectividad del tratamiento. Si esto no se consigue, recomendamos proseguir e intentar el tratamiento, la literatura sugiere que la rehabilitación puede ser beneficiosa sin un diagnóstico claro.<sup>3</sup> Es posible que el tratamiento pueda abordar los factores precipitantes y perpetuantes de los síntomas.

### **La fisioterapia no está ayudando más y no sé cómo dar de alta al paciente**

Previamente en este artículo hemos discutido el hecho de establecer los objetivos y un contrato de tratamiento. En algunos casos el fisioterapeuta se puede encontrar en la situación en que un paciente desea continuar con el tratamiento a pesar de que éste no está causando una mejoría significativa. En esta situación sugerimos transparencia con el paciente acerca de su falta de mejoría y del hecho de que la fisioterapia no está ayudando. Esto no excluye que dicho tratamiento no pueda ayudar en algún momento más adelante. Si estás trabajando con muchos pacientes con TMF es esencial focalizar tus esfuerzos donde es más probable que vayan a tener un impacto. Los equipos que no hacen esto pueden desmoralizarse bastante rápido. Un ejemplo de qué decir en esta situación sin culpabilizar al paciente se describe en la Tabla 3. “Has trabajado realmente duro en estas sesiones y espero que tú también creas que yo lo he hecho. Siento no haber podido ayudar más. No creo que más tratamiento por mi parte vaya a ser beneficioso en estos momentos. Recuerda que con tu diagnóstico siempre existe la posibilidad potencial de mejorar más adelante.”

### **¿Cómo debo manejar la situación donde hay mucha presión puesta sobre mí para darle el alta al paciente del hospital pero no han mejorado y no se sienten capaces de volver a domicilio?**

A menudo oímos a los terapeutas que trabajan en unidades de agudos en hospitales que no se sienten apoyados a la hora de organizar un alta dificultosa del hospital. En situaciones complejas, la toma de decisiones y el plan de alta debe involucrar a un equipo multidisciplinar. Nadie debe sentirse responsable de manera individual de las decisiones tomadas. Puede ser apropiado tener una reunión con el equipo, el paciente y la familia antes del alta. El equipo médico responsable puede necesitar formación en trastornos funcionales y en el valor de la rehabilitación.

### **Mi paciente quiere hablar conmigo de acontecimientos traumáticos. ¿Qué debo hacer?**

No es infrecuente que los pacientes le confíen información al fisioterapeuta acerca de síntomas psicológicos o eventos traumáticos que no han comunicado previamente. Sugerimos que se tenga en cuenta la información pero que se deje claro que este no es el propósito de la fisioterapia. Puede ser una oportunidad para enseñar al paciente cómo la terapia psicológica, cuando es apropiada puede complementar a la fisioterapia para el tratamiento de su trastorno. Asegurarse de que el médico que deriva al paciente recibirá esta información para evaluaciones futuras incluyendo evaluación del riesgo.

### **Tengo sospechas de que mi paciente está ansioso o deprimido pero lo niega y no cree que necesite tratamiento psicológico. ¿Cómo puedo ayudar en esta situación?**

Es poco probable que una derivación al psicólogo vaya a ser beneficiosa si el paciente piensa que el tratamiento psicológico no es relevante para su problema y además puede perjudicar la relación terapéutica. Después de desarrollar cierta confianza, es posible que pueda reconocer síntomas psicológicos. Para otros pacientes, el proceso de la fisioterapia puede ayudarles a relacionar el impacto del estrés u otros factores psicológicos con los síntomas.

## **Estoy preocupado acerca de la posibilidad de empeorar al paciente “alimentando” o “medicalizando” sus creencias o comportamientos.**

Muchos profesionales de la salud se encuentran preocupados acerca de ofrecer rehabilitación y que en ocasiones esto medicalice el problema y por tanto lo alimente. Sugerimos que no es menos apropiado “medicalizar” trastornos funcionales que medicalizar la migraña o la depresión. Hemos discutido la importancia de que el paciente aborde el tratamiento con las creencias correctas sobre la enfermedad. Discutir los síntomas o darle la importancia necesaria a las preocupaciones del paciente es un paso esencial en el tratamiento. Sería perjudicial reforzar las creencias de que los TMF son irreversibles, progresivos, peligrosos, causados por un proceso patológico siniestro o incrementar en cualquier caso la ansiedad relacionada con la salud.

### **CASOS DE ESTUDIO**

Los siguientes 4 casos han sido seleccionados para demostrar cómo las recomendaciones anteriores pueden llevarse a cabo de una forma práctica. Los pacientes descritos en cada caso son ficticios pero están basados en situaciones a las que frecuentemente nos enfrentamos y en nuestra experiencia con pacientes que han respondido bien al tratamiento. Estamos de acuerdo en que otros profesionales de la salud pueden tener un papel importante en los casos que se utilizan como ejemplos, pero por claridad, sólo se detalla el tratamiento fisioterápico.

#### **Temblores**

La señorita A tiene una historia de temblor en el brazo derecho de 12 meses de duración, que comenzó tras una reacción adversa a una medicación para aliviar su migraña. En aquel momento, se le dijo que no tenía que preocuparse del temblor y que desaparecería en pocos días. Sin embargo, el temblor persistió y era la causa de que se avergonzase con frecuencia. Para suprimir el temblor apretaba el puño y cuando estaba delante de otras personas escondía la mano en el bolsillo o detrás en la espalda. Poco a poco notaba su mano cada vez más dolorida y sentía que el temblor iba progresando. La señorita A fue valorada por un neurólogo que le diagnosticó con temblor funcional en función a las características clínicas del mismo. Se solicitó un número mínimo de pruebas que resultaron negativas. Se derivó a fisioterapia para el manejo del temblor funcional.

#### **Valoración fisioterápica**

Tras una historia clínica exhaustiva y valoración física, el fisioterapeuta anotó los siguientes problemas:

1. Temblor persistente en brazo derecho que es variable en frecuencia y amplitud.
2. La señorita A acepta el diagnóstico pero encuentra difícil entender por qué le ha ocurrido a ella.

3. Desuso habitual. La señora A esconde su mano cuando está en público. Se ha acostumbrado a utilizar sólo su mano izquierda para las actividades, incluyendo escribir con su mano izquierda, no dominante.
4. Hipersensibilidad y dolor que afectan la mano y el antebrazo derecho.
5. Tirantez en flexores de los dedos y la muñeca debido al cierre constante del puño. El dolor dificulta la valoración del rango de movimiento pero parece que hay cierto grado de contractura muscular.
6. Fatiga con patrones de exceso de actividad.
7. La señorita A explica que su ánimo está bajo, pero que esto sólo ha sido un problema desde que empezó el temblor. Teme la posibilidad de poder perder su trabajo y está muy preocupada por si su temblor podía ser debido a una enfermedad neurológica progresiva.

Los objetivos de la señorita A eran poder escribir con su mano derecha y volver a su actividad normal en el trabajo.

### Tratamiento fisioterápico

La fisioterapia comenzó mejorando la comprensión del diagnóstico que tenía la señorita A, describiendo el temblor como un patrón aprendido de movimiento. Se discutió como la reacción a la medicación fue claramente importante en desencadenar el temblor, pero que las pruebas realizadas habían mostrado que este evento no parecía haber causado un daño estructural. El temblor tiene más en común con un patrón de movimiento aprendido que con un temblor producido por una enfermedad neurológica. Una característica de este tipo de temblor es que requiere atención para manifestarse. Esto explica por qué el temblor cambia cuando se dirige la atención fuera del síntoma y ésta es la forma en la que el neurólogo diagnosticó el temblor. Se le explicó cómo redirigir la atención se puede usar para ayudar a reentrenar al cerebro y los músculos del brazo para detener el temblor. Que esto es algo difícil de conseguir y requiere tiempo y práctica. El objetivo debe ser inicialmente intentar desarrollar algo de control sobre el temblor y lentamente con el tiempo, ir reduciendo el impacto que tiene en el día a día.

El fisioterapeuta guió a la señorita A en la exploración de cómo ella podría influir en el temblor, usando un espejo como fuente de retroalimentación. La señorita A pudo observar como ciertas posturas parecían exacerbar el temblor, en particular la hiperactividad de la parte superior de los músculos trapecios al elevar los hombros. Además aprendió como hacer que el temblor se sincronizara con movimientos fluidos amplios como si dirigiera una orquesta y aplaudir a la misma frecuencia del temblor y luego ir cada más despacio.

En las sesiones de fisioterapia, la señorita A desarrolló un plan de manejo que incluía lo siguiente-

1. Practicar estrategias para controlar su temblor 2 o 3 veces al día.
2. Intentar evitar apretar su puño para suprimir el temblor. Estaba de acuerdo con que hacía que el temblor se notara menos pero que a largo plazo era contraproducente ya que resultaba en tirantez de los músculos, dolor y exacerbación del temblor.

3. Desensibilizar la mano derecha usándola poco a poco cada vez más, secándola con una toalla áspera, usando crema hidratante y permitiendo a otros tocar la mano cuidadosamente.
4. Mejorar el desuso habitual de la mano derecha incorporando el uso de la mano en algunas actividades específicas como punto de partida. Podía ser lavar su pelo, lavar y tratar de cepillar sus dientes con la mano derecha. Se remarcó el hecho de que al principio esto podía ser menos eficiente que no usar la mano para nada, pero que debía ir mejorando con práctica.
5. Manejar la fatiga reduciendo los patrones de exceso/ausencia de actividad y comenzando un programa de ejercicio y actividad graduado.

Después de varias sesiones de fisioterapia y de llevar a cabo el plan de manejo, la señorita A sentía como si tuviera mayor control sobre su temblor. El temblor continuó pero era menos severo y la paciente notó que había momentos durante el día donde el temblor era menos prominente y en ocasiones ausente. La hipersensibilidad y el dolor había mejorado en una escala analógica visual y el uso de su mano derecha era más llevadero. En días buenos era capaz de firmar con su mano derecha. La señorita A fue dada de alta después de 8 sesiones y se organizó una visita de revisión a los 6 meses. En la visita de revisión las cosas habían mejorado pero la fatiga persistía y su ánimo seguía bajo. El fisioterapeuta sugirió a la señorita A que discutiera el manejo del ánimo bajo y de la fatiga con su médico. El plan de manejo de la señorita A se actualizó para asegurar que los cambios conseguidos con el temblor se mantuvieran. Se envió un informe de alta a la paciente al médico de cabecera y al neurólogo que la enviaba, en el que se invitaba a que se derivara de nuevo a la paciente si había cualquier deterioro en los síntomas.

*Comentario:* Este caso ilustra los principios esenciales en la guía publicada. Además muestra que una valoración exhaustiva puede revelar problemas asociados con el temblor que pueden ser abordados por la fisioterapia. Es frecuente que los pacientes queden con síntomas residuales después de cierta mejoría y esto no debe ser interpretado como una mala respuesta al tratamiento. Existe un papel para otros profesionales de la salud que no se han discutido incluyendo la terapia ocupacional y la terapia psicológica.

### **Distonía fija**

La Sra B, una mujer de 36 años de edad, presentaba una flexión plantar fija e inversión del tobillo. Hacía 18 años, tuvo una caída inesperada y una lesión en el tobillo. Incapaz de apoyar el peso en la extremidad, acudió al Servicio de Urgencias de su hospital local. Allí fue valorada, se le realizó una radiografía que no reveló ninguna fractura y fue dada de alta a domicilio con muletas y tratamiento analgésico. A lo largo de los siguientes meses, el dolor parecía empeorar, se mantuvo incapaz de mantener su peso sobre ese pie y dependía de las muletas para caminar. Unos meses después de la lesión inicial, la Sra B comenzó a notar que su pié había comenzado a doblarse hacia adentro. Fue referida a un fisioterapeuta que recomendó estiramientos pasivos, después de los cuales la Sra B



tuvo más dolor durante las siguientes 48 horas. La postura en inversión progresó y su tobillo quedó completamente “bloqueado”. Se solicitaron nuevas pruebas complementarias y una evaluación bajo anestesia que demostró un rango de movilidad aceptable. Durante la sedación su tobillo se colocó en una escayola en una posición neutral. Esto resultó ser muy doloroso y acabó con la piel desquebrajada. Cuando se retiró la escayola 6 semanas más tarde, el pie inmediatamente volvió a la posición de flexión plantar e inversión y se había vuelto muy sensible al tacto. La Sra B fue derivada de nuevo a fisioterapia, esta vez con el diagnóstico de distonía fija. Fue reacia a consultar de nuevo, ya que su experiencia previa con fisioterapia fue muy dolorosa y fue de ayuda.

#### Valoración fisioterápica

Los siguientes problemas fueron anotados durante la valoración

- Dolor severo que afectaba al pie izquierdo y al tobillo, que se exacerbaba con el apoyo del peso y los movimientos pasivos. La Sra B tomaba altas dosis de analgésicos que sólo ayudaban un poco.
- Alteración del tacto en el pie y el tobillo. Además, la Sra B explicaba que sentía su pie como si estuviera recto, cuando se encontraba en realidad en una posición de inversión.
- Posturas adoptadas habitualmente al sentarse en las que las articulaciones del pie y del tobillo se encontraban en una “postura distónica” con las articulaciones en posición forzada (flexión plantar e inversión).
- Dependencia de muletas para caminar, apoyando su peso corporal predominantemente en extremidades superiores. Avanzaba con su pierna derecha e izquierda a la vez, evitando apoyar el peso sobre el lado izquierdo. Al sentarse, únicamente la superficie lateral y dorsal de su pie izquierdo podía descansar en el suelo.
- Dolor de hombro secundario al uso forzoso de las muletas y por lo que la Sra B había comenzado a usar una silla de ruedas.
- Patrones alterados de movimiento al pasar de sentada a levantarse y movimiento descontrolado al pasar de la bipedestación a posición de sentada, con mínimo peso a través de la pierna izquierda.

#### Tratamiento con fisioterapia

El fisioterapeuta tranquilizó a la paciente diciendo que había visto más pacientes con distonía fija antes y que aunque no era muy común, no era un diagnóstico raro o inusual. La fisioterapia comenzó ayudando a la paciente a entender el problema de la distonía fija. Se le explicó que la lesión inicial fue importante en desencadenar el problema. El daño, unido al dolor persistente cambió el modo en que el movimiento es controlado y que era posible ganar cierto control sobre el pie. Se discutió el hecho de que para ella era difícil explicar por qué le había pasado esto a ella, sin embargo por un número de razones, la postura anormal había sido aprendida involuntariamente por el cerebro y estaba fuera del control de la Sra B. Se describió como el tobillo acaparaba la atención de la Sra B, posiblemente debido al dolor y que la atención sobre la extremidad producía o exacerbaba la postura del tobillo. La experiencia que la Sra B había descrito, que cuando cerraba sus ojos, sentía el pie en posición neutra, cuando realmente se encontraba invertido se describe frecuentemente en la distonía fija. Esto ayudó a explicar que

una parte importante del problema tiene que ver con el modo en que el cerebro procesa la información (incluyendo el dolor) produciendo un mapa distorsionado en el cerebro pero que es posible reentrenar. Se le explicó a la Sra B que la terapia manual y los tratamientos pasivos como los estiramientos y los cabestrillos eran normalmente contraproducente porque aumentaban la atención hacia la zona afecta, lo cual exacerbaba la postura anormal. Además, no ayudaban a reentrenar a los músculos. El fisioterapeuta le explicó que una mejor forma de rehabilitación es abordar el dolor y cambiar los patrones de movimiento habituales, posturas y comportamientos que reforzaban la postura anormal.

El reentrenamiento del movimiento progresó a través de los siguientes objetivos:

- Reentrenar la manera de pasar de sentado a levantado y de nuevo sentado. Este objetivo le permitió a la Sra B a redirigir el foco de atención lejos del pie. Se le animó a apoyar más peso sobre la pierna. En unas sesiones de fisioterapia el patrón de la pierna mejoró resultando en una activación de los músculos dorsiflexores del tobillo izquierdo, que a su vez redujeron la flexión plantar y la inversión, que a su vez mejoró la posición del pie al levantarse y sentarse.
- Levantarse con una posición del pie más adecuada. Al levantarse con un patrón de movimiento mejor, el pie izquierdo se encontraba en una mejor posición para aceptar peso. Añadiendo un balanceo antero-posterior del peso corporal rítmico ayudar a mejorar el alineamiento mediante la activación y relajación de los músculos para la flexión plantar y dorsiflexión del tobillo.
- Levantarse con el peso distribuido sobre los dos pies. El balanceo del peso corporal rítmico lateral ayudó a introducir peso a través del pie izquierdo y crear la confianza para tomar peso sin miedo de que el tobillo le fallara o aumentara de manera significativa el dolor. El feedback de un espejo ayudó.
- Lentamente, en las siguientes sesiones el objetivo fué reentrenar de la marcha mediante la introducción de pasos a su alineamiento en bipedestación mejorado. Se animó gradualmente a la Sra B a disminuir la cantidad de peso apoyado sobre sus muletas y aumentar el peso a través de las piernas. La estimulación eléctrica funcional y la cinta de correr con el feedback de un espejo fueron ingredientes útiles en las sesiones de fisioterapia.

Además del reentrenamiento del movimiento, la Sra B escribió un plan de manejo personal en su cuaderno de fisioterapia y lo actualizaba después de cada sesión. Esto incluía los planes y los objetivos siguientes:

- Reducir el tiempo que empleaba en la “posición distónica” contraproducente (articulaciones en posición extrema) cuando se sentaba. Entendió que aunque esas posiciones parecían mejorar la sensación de confort, estaban dañando la articulación del tobillo, exacerbando el dolor cuando intentaba estirar el tobillo y probablemente contribuía a la sensación alterada de la posición de la articulación.
- Levantarse y sentarse usando su nuevo y mejorado patrón de movimiento cada vez que tuviera una oportunidad, con el objetivo de que se automatizara.
- Cambiar el patrón de caminar con muletas de forma que suprimiera el hábito de balancear ambas piernas a la vez. Este objetivo se abordó gradualmente ya que la Sra B sentía que no

era posible hacer grandes cambios debido al esfuerzo y el dolor aumentado y la disminución de la velocidad de realizar pasos recíprocos.

- Planear su semana para evitar patrones de exceso /ausencia de actividad, y organizar las actividades con descansos breves para evitar que el dolor escalara a niveles excesivos.

A veces la fisioterapia progresó de manera muy lenta y el intervalo entre algunas sesiones se extendió para poder acomodarlo. La Sra B experimentó un número de exacerbaciones del dolor y posturas anormales durante su rehabilitación pero con descanso y algo de apoyo fue capaz de recuperarse. Doce meses después, las cosas habían mejorado significativamente. Sólo requería una sola muleta para caminar, pero iba apoyando la mayor parte de su peso sobre el pie izquierdo. Aún no se sentía preparada para dejar su muleta. La Sra B comentó que se sentía un poco decepcionada de que las cosas no hubieran mejorado completamente, pero se encontraba aliviada de ver que no iban a peor. Entendió que el tiempo era un factor limitante en su recuperación y que siguiendo su plan de manejo las cosas deberían continuar mejorando. Continuó experimentando recaídas ocasionales, y se frustraba mucho con la lentitud de su recuperación pero era optimista de que las cosas continuarían mejorando.

### **Trastorno de la marcha funcional**

El señor C tenía una historia de trastorno de la marcha de 2 años de evolución que comenzó tras una caída en unas escaleras. En aquel momento ingresó en un hospital con la sospecha de un traumatismo medular pero las pruebas realizadas resultaron normales. A pesar de ello, el señor C tenía mucho dolor, pérdida de fuerza en ambas piernas y cuando se le ayudaba para mantenerse erguido las piernas le temblaban. Estuvo 5 días en el hospital recibiendo tratamiento con fisioterapia y terapia ocupacional y se dio de alta a domicilio con tratamiento analgésico, un andador y algunos equipamientos adaptativos. En los meses siguientes la movilidad del señor C mejoró y no requirió soporte para caminar pero su patrón de marcha no se normalizó. Persistía algo confuso sobre los síntomas que persistían y sentía que no se le había dado la importancia que debía a su caída. Cuando las cosas no habían mejorado después de 18 meses, se derivó de nuevo para una valoración neurológica. Se realizó el diagnóstico de trastorno de la marcha funcional basado en signos clínicos positivos y en algunas pruebas que se repitieron. Se ayudó al señor C a entender cómo el daño en la espalda y el dolor posterior fueron desencadenantes importantes para desarrollar su problema en la marcha pero que no había un daño estructural subyacente. El señor C fue referido a fisioterapia para valoración y tratamiento del trastorno de la marcha.

#### *Valoración fisioterápica*

Se anotaron los siguientes problemas en la valoración-

- Dolor lumbar continuo. El dolor variaba en intensidad de 4 a 10 de 10 y se exacerbaba al caminar durante unos minutos.
- Dependencia de dos muletas para caminar.

- Patrón de marcha caracterizado por movimientos temblorosos durante la fase de apoyo de la marcha. La fase de balanceo era dificultosa y tenía un contacto inicial con el antepié. Tenía episodios intermitentes de congelamiento, donde era incapaz de iniciar el balanceo.
- El señor C comunicó que tenía al menos 5 caídas a la semana. Rara vez se había dañado durante una caída, pero en ocasiones había tenido cortes y hematomas.
- Normalmente era independiente para su cuidado personal. Durante los días buenos era capaz de hacer todas las tareas del hogar y preparar las comidas pero en los días malos era incapaz de levantarse de la cama.
- Tenía mucha dificultad para dormir por la noche por el dolor y a menudo se quedaba dormido por la tarde.

### *Tratamiento fisioterápico*

El servicio de fisioterapia era únicamente capaz de ofrecer bloques de 8 sesiones de tratamiento y esto se le explicó al señor C antes de comenzar el tratamiento. Las 8 sesiones de fisioterapia incluían educación y reentrenamiento del movimiento mientras se desarrollaba un plan de manejo personal.

El fisioterapeuta exploró las creencias que el señor C tenía sobre sus síntomas y el diagnóstico dejando claro que debía sentirse libre para ser honesto sobre lo que pensaba. El fisioterapeuta abordó las preocupaciones del señor C, primero reconociendo la severidad de los síntomas y la discapacidad resultante. Discutieron objetivamente los resultados de las pruebas que mostraban que su médula espinal estaba intacta y entonces explicó cómo era posible tener síntomas neurológicos tales como debilidad o problemas de coordinación y equilibrio con un sistema neurológico intacto. El fisioterapeuta describió el daño inicial al señor C como el desencadenante de una cascada de eventos que había cambiado el modo que el cerebro procesa las señales motoras y sensitivas y que condujo a la aparición del trastorno de la marcha funcional. Se discutió que el shock o la reacción de lucha o huida en el momento del daño inicial pueden ser importantes. Esta información fue reforzada demostrándole como los signos clínicos positivos de su marcha funcional apoyaban el diagnóstico, por ejemplo el signo de Hoover o que la marcha hacia atrás era más fácil que hacia adelante.

El señor C interpretaba su dolor persistente como un signo de daño persistente. El tratamiento incluía ayudarlo a comprender el concepto de sensibilización central y que la experiencia de dolor en su caso no significaba un daño. Se le explicó de manera sencilla que el dolor crónico puede ser entendido como el “botón para regular el volumen” que se ve incrementado en las vías que conducen la sensación de dolor a través del sistema nervioso. El dolor fue abordado como parte del manejo de la fisioterapia instruyendo al paciente, identificando conductas maladaptativas (como los ciclos de exceso/ausencia de actividad que tenía el señor C), identificando posturas y patrones maladaptativos y se comenzó con un plan de ejercicios y actividad graduada. El plan se revisó y se actualizó en las siguientes sesiones de fisioterapia.

Los componentes del tratamiento que consistían en reentrenar el movimiento se centraron en conseguir que el señor C progresara de manera adecuada en la secuencia correcta de movimientos comenzando desde la posición de sentado a levantarse. Esto se siguió de movimientos en bipedestación de balanceo del peso corporal de manera rítmica y fluída. El balanceo del peso

corporal se usó para arrastrar y suprimir el temblor que tenía en sus piernas. El hecho de dar pasos se había convertido para el señor C en algo muy dificultoso, así que el objetivo fue iniciar algunos pasos de manera relajada y “automática”. Esto se consiguió permitiendo a los pies avanzar muy poco durante el balanceo. Inicialmente fue muy difícil suprimir los pasos rígidos del señor C pero con perseverancia al final fue capaz de deslizar los pies hacia adelante. Manteniendo su foco de atención en el balanceo del peso corporal, con el tiempo fue capaz de mejorar la longitud de sus pasos y el patrón de sus movimientos evolucionó hacia una marcha normal. Esto se practicó en barras paralelas para el soporte y tranquilidad, a pesar de que se disuadió al señor C de soportar su peso a través de sus manos. A la quinta sesión de fisioterapia, el señor C era capaz de usar esta técnica, con menos énfasis en el balanceo del peso corporal, era capaz de dar varios pasos fluidos, apoyarse muy poco en los muebles o en las paredes. En este punto, la fisioterapia se centró más específicamente en ejercicios de reentrenamiento de la marcha. Andar deslizando los pies en el suelo evitaba la excesiva flexión plantar y el contacto inicial con el antepié. En una sola sesión se progresó desde andar deslizando los talones en el suelo hasta caminar “tocando ligeramente con los talones” (golpes de talón). Estos ejercicios proporcionaron un foco de atención diferente, que parecía ayudar a disminuir la marcha dificultosa. Esta progresión de movimientos se practicó en las siguientes sesiones y se animó al señor C a intentar usar esta progresión de diferentes pasos para normalizar su marcha en casa. En la séptima sesión el señor C había desarrollado una serie de estrategias que podía usar para mejorar el patrón de su marcha. Sentía que necesitaba concentrarse a la hora de andar con el patrón de movimiento nuevo y que fácilmente, cuando se distraía, volvía a usar el patrón de marcha dificultoso. Las sesiones finales de fisioterapia se centraron en ayudar que su marcha fuera más automática y en aumentar la velocidad. Se usaron las cintas de correr en frente de un espejo y se practicó la marcha en espacios abiertos y en ambientes que suponían un reto, y se animó al señor C a utilizar las diferentes estrategias para controlar su marcha y tomar una serie de descansos cortos si los movimientos empeoraban.

El señor C dejó de utilizar sus muletas en casa y en las sesiones de fisioterapia pero no se sentía seguro para salir de casa sin ellas. Cuando se le presionó para caminar en ambientes difíciles sin muletas, el patrón de marcha empeoró mucho. Se discutió en que sería probablemente contraproducente acelerar el proceso de abandonar las muletas. Que podía minimizar los problemas que las muletas causaban evitando soportar todo el peso de su cuerpo a través de sus manos. Practicaron caminar con una sola muleta e hicieron un plan para reducir lentamente su uso empezando en ambientes familiares o en salidas cortas como ir a las tiendas cerca de su domicilio.

En la sesión de fisioterapia final se revisó toda la información que se había proporcionado al señor, que se había resumido en el libro de trabajo de fisioterapia. Se finalizó el plan de manejo y se incluyó una lista de estrategias de movimiento que habían sido útiles para normalizar la marcha del señor C, un plan de ejercicios graduados y una sugerencia de lo que podía hacer en esos días inevitablemente malos. El señor C fue dado de alta de fisioterapia con un informe detallado que se envió a su médico de cabecera y al neurólogo que le enviaba. Se acordó que el señor C podía ser derivado de nuevo al servicio en el futuro y que podía contactar por teléfono con el fisioterapeuta si tenía cualquier duda.

## **Debilidad**

La Sra D fue ingresada en una planta de neurología de agudos desde el servicio de urgencias por debilidad del hemicuerpo izquierdo. Se realizaron una serie de pruebas complementarias que incluyeron una RM cerebral y medular, estudios de conducción nerviosa y análisis de sangre. Todos los resultados fueron normales. La Sra D fue trasladada a la planta de fisioterapia para iniciar rehabilitación y facilitar el alta del hospital.

### Valoración fisioterápica

Se anotaron los siguientes problemas durante la valoración:

- Fuerza reducida en la extremidad superior e inferior izquierda. En la valoración la fuerza era de aproximadamente 2-3/5, con cierta debilidad "give away".
- Sensación reducida del tacto fino en hemicuerpo izquierdo.
- La Sra D fue capaz de moverse de manera independiente desde posición de tumbada a sentada con esfuerzo usando su mano derecha para levantar su pierna izquierda sobre el borde de la cama. Tenía equilibrio para mantenerse sentada independientemente pero se sentía incapaz de levantarse y tenía miedo a caerse. Era independiente para las transferencias sobre articulaciones pivotes.
- La Sra D dijo que nadie le había explicado que era lo que fallaba en ella, sin embargo, estaba documentado en la historia clínica que el diagnóstico de paresia funcional se le había dado a la paciente.
- La Sra D estaba preocupada por la posibilidad de ser dada de alta sin un "diagnóstico apropiado" y ser incapaz de cuidar de sí misma. Se sentía muy sola y echaba de menos a sus amigos y familia.

### Tratamiento fisioterápico

El fisioterapeuta sintió que el tratamiento no podría progresar de manera eficiente hasta que la Sra D tuviera un mejor entendimiento del diagnóstico. Después de discutirlo más, la Sra D reconoció que alguien le había dicho que tenía una paresia funcional pero se describía a sí misma como confusa sobre lo que le había pasado y el por qué. Se organizó una reunión familiar con la Sra D, su marido, el neurólogo, la enfermera de planta y el equipo de terapeutas. En la reunión, el neurólogo explicó que el diagnóstico de paresia funcional se basaba en la forma de presentación de sus síntomas. Se demostró el signo de Hoover positivo y se explicó cómo este signo mostraba que era posible que los músculos de la pierna izquierda se activaran al mover la pierna derecha. Esto demostraba que "el cableado" desde la pierna izquierda hasta el cerebro está intacto pero que el problema reside en el cerebro que tiene dificultades para enviar el mensaje. Por esta razón es posible reentrenar los mensajes con rehabilitación incluyendo fisioterapia y terapia ocupacional. El neurólogo también explicó cómo las pruebas que se habían realizado habían descartado algunas otras causas comunes de debilidad como un ictus. Se discutió que la pregunta "por qué los síntomas funcionales ocurren" es más difícil de responder, del mismo modo que tampoco entendemos completamente por qué ocurren otras enfermedades neurológicas como la esclerosis múltiple. La respuesta es probable que sea multifactorial, a menudo ocurren después de lesiones o enfermedades y es diferente en cada caso. Se discutió como los factores psicológicos pueden ser a veces importantes y que una

rehabilitación multidisciplinar a menudo incluye terapia psicológica. La Sra D estuvo de acuerdo en tener una visita con el psicólogo para valoración.

En la siguiente sesión, la Sra D demostró un buen entendimiento de su condición, indicando que era consciente de que no había ningún problema estructural. Expresó interés en conocer que debía hacer para ayudarse a sí misma. Junto a otro colega, el fisioterapeuta ayudó a la Sra D a conseguir levantarse desde la posición de sentada en el borde de la cama. Un terapeuta proporcionó asistencia sujetando una mano en el brazo izquierdo y el otro terapeuta se encontraba sentado en frente de la Sra D, ofreciendo seguridad y mínima facilitación sólo en las rodillas. Siguiendo 3 repeticiones de pasar de la posición de sentada a levantada, se empleó más tiempo discutiendo el diagnóstico y respondiendo a las preguntas de la Sra D. Se le explicó como estaban utilizando actividad muscular automática, que permitía a la Sra D a mantenerse de pie y le permitiría con tiempo andar. Se le dio una lista de cosas que podía hacer para contribuir a su rehabilitación. Esto incluía cambiar el modo en que realizaba las transferencias, reduciendo el peso sobre sus brazos y permitiendo mayor actividad automática en sus piernas. También incluía sentarse en una silla, si lo toleraba, e intentar usar ambas manos mientras tomaba una bebida, se lavaba y comía. El terapeuta ocupacional ofreció apoyo adicional para ello. Discutieron como los ejercicios en la cama eran menos útiles que los movimientos automáticos con propósito (como levantarse y hacer las transferencias de la cama a la silla).

Al día siguiente, la Sra D se manejaba para moverse desde sentada a bipedestación con menos soporte. El tratamiento incluía 3 levantadas durante 1 minuto y balanceo del peso corporal lateral cuando estaba levantada. La Sra D se manejó para moverse 2 metros con la asistencia de sujetar una mano y mínima facilitación en las rodillas. El tratamiento se repitió por la tarde cuando la señora D se manejó para dar dos vueltas de 3 metros con asistencia. La Sra D recibió mucho aliento y retroalimentación positiva durante la sesión.

El día 3, el objetivo del tratamiento fue caminar. La asistencia se le dio "tocando los dedos" donde el terapeuta se coloca en frente del paciente y ofrece mínimo apoyo a través de las puntas de sus dedos. Esto aseguró que la Sra D era capaz de no apoyarse excesivamente sobre sus extremidades superiores y todo el peso corporal se soportaba sobre las piernas. Esta posición también permitió buen contacto visual entre el fisioterapeuta y la paciente para incitar y alentar y evitar que mirase hacia abajo. La Sra D consiguió caminar 7 metros con un descanso. Durante los siguientes días, se continuó con la reeducación de la marcha, con la Sra D usando soporte sobre las puntas de sus dedos en paredes, muebles o barras paralelas. Se discutió el razonamiento para evitar caminar con apoyos. Se explicó como los apoyos facilitan mayor apoyo sobre los brazos y esto impediría progresar. Que para asegurar la actividad muscular óptima, era importante que todo el peso corporal se aguantara en las piernas. La Sra D quedó satisfecha con la explicación. El día 6 estaba caminando con supervisión y era capaz de caminar al baño con enfermería. El día 8 la Sra D pudo realizar un tramo de escaleras y pudo ir a casa con permiso de fin de semana, hecho que fue un éxito. Su patrón de marcha era aún bastante anormal con marcada indecisión antes de dar el paso con la pierna derecha. Para abordar esto se usó la cinta de caminar y su patrón de marcha se normalizó en dos sesiones, quedando únicamente mínima indecisión. La Sra D fue dada de alta a domicilio con derivación a un programa de ejercicios de gimnasio y al equipo rehabilitador local.

## Agradecimiento Ninguno

Papel de los autores GN, JS and ME prepararon el primer boceto del manuscrito. Todos los autores estaban presentes en la reunión del consenso y estuvieron de acuerdo con el contenido que se ha incluido en el manuscrito final. GN, JS and ME revisaron el manuscrito. Todos los autores revisaron el manuscrito revisado

Declaración de la financiación GN está financiado por un NIHR Clinical Doctoral Research Fellowship. ME está financiado por una beca de investigador clínico NIHR. JS está financiado por un NHS Scotland NRS Career Research Fellowship.

## Conflicto de intereses Ninguno

Fuentes de financiación para el estudio Ninguna

## REFERENCIAS

1. Jordbru AA, Smedstad LM, Klungsøyr O, et al. Psychogenic gait disorder: a randomized controlled trial of physical rehabilitation with one-year follow-up. *J Rehabil Med* 2014;46:181–7.
2. Czarnecki K, Thompson JM, Seime R, et al. Functional movement disorders: successful treatment with a physical therapy rehabilitation protocol. *Parkinsonism Relat Disord* 2012;18:247–51.
3. Nielsen G, Stone J, Edwards MJ. Physiotherapy for functional (psychogenic) motor symptoms: a systematic review. *J Psychosom Res* 2013;75:93–102.
4. Stone J, Carson A, Duncan R, et al. Who is referred to neurology clinics? The diagnoses made in 3781 new patients. *Clin Neurol Neurosurg* 2010;112:747–51.
5. Carson A, Stone J, Hibberd C, et al. Disability, distress and unemployment in neurology outpatients with symptoms ‘unexplained by organic disease’. *J Neurol Neurosurg Psychiatry* 2011;82:810–13.
6. Birmingham SL, Cohen A, Hague J, et al. The cost of somatisation among the working-age population in England for the year 2008–2009. *Ment Health Fam Med* 2010;7:71.
7. Gelauff J, Stone J, Edwards M, et al. The prognosis of functional (psychogenic) motor symptoms: a systematic review. *J Neurol Neurosurg Psychiatry* 2014;85:220–6.
8. Edwards MJ, Stone J, Nielsen G. Physiotherapists and patients with functional (psychogenic) motor symptoms: a survey of attitudes and interest. *J Neurol Neurosurg Psychiatry* 2012;83:655–8.
9. Edwards MJ, Adams RA, Brown H, et al. A Bayesian account of ‘hysteria’. *Brain* 2012;135:3495–512.
10. Pareés I, Kojovic M, Pires C, et al. Physical precipitating factors in functional movement disorders. *J Neurol Sci* 2014;338:174–7.
11. Stone J, Warlow C, Sharpe M. Functional weakness: clues to mechanism from the nature of onset. *J Neurol Neurosurg Psychiatry* 2012;83:67–9.
12. Stone J, LaFrance WC Jr, Brown R, et al. Conversion disorder: current problems and potential solutions for DSM-5. *J Psychosom Res* 2011;71:369–76.
13. Stone J, Carson A. Functional and dissociative (psychogenic) neurological symptoms. In: Daroff RB, Fenichel GM, Jankovic J, Mazziotta J. eds. *Bradley’s neurology in clinical practice*. Philadelphia: Elsevier, 2012. pp. 2147–62.



14. Edwards MJ, Bhatia KP. Functional (psychogenic) movement disorders: merging mind and brain. *Lancet Neurol* 2012;11:250–60.
15. Stone J. The bare essentials: functional symptoms in neurology. *Pract Neurol* 2009;9:179–89.
16. Duncan R, Razvi S, Mulhern S. Newly presenting psychogenic nonepileptic seizures: incidence, population characteristics, and early outcome from a prospective audit of a first seizure clinic. *Epilepsy Behav* 2011;20:308–11.
17. Espay AJ, Goldenhar LM, Voon V, et al. Opinions and clinical practices related to diagnosing and managing patients with psychogenic movement disorders: an international survey of movement disorder society members. *Mov Disord* 2009;24:1366–74.
18. McKenzie P, Oto M, Russell A, et al. Early outcomes and predictors in 260 patients with psychogenic nonepileptic attacks. *Neurology* 2010;74:64–9.
19. Edwards MJ, Stone J, Lang AE. From psychogenic movement disorder to functional movement disorder: it's time to change the name. *Mov Disord* 2013;29:849–52.
20. Stone J, Edwards M. Trick or treat? Showing patients with functional (psychogenic) motor symptoms their physical signs. *Neurology* 2012;79:282–4.
21. Dallochio C, Arbasino C, Klersy C, et al. The effects of physical activity on psychogenic movement disorders. *Mov Disord* 2010;25:421–5.
22. White P, Goldsmith K, Johnson A, et al. Comparison of adaptive pacing therapy, cognitive behaviour therapy, graded exercise therapy, and specialist medical care for chronic fatigue syndrome (PACE): a randomised trial. *Lancet* 2011;377:823–36.
23. Stone J, Gelauff J, Carson A. A “twist in the tale”: altered perception of ankle position in psychogenic dystonia. *Mov Disord* 2012;27:585–6.
24. Butler DS, Moseley GL. Explain pain. Adelaide: Noigroup Publications, 2003.
25. Nijs J, Paul van Wilgen C, Van Oosterwijck J, et al. How to explain central sensitization to patients with ‘unexplained’ chronic musculoskeletal pain: practice guidelines. *Man Ther* 2011;16:413–18.
26. Schrag A, Trimble M, Quinn N, et al. The syndrome of fixed dystonia: an evaluation of 103 patients. *Brain* 2004;127:2360–72.
27. Adrian E, Yealland LR. The treatment of some common war neuroses. *Lancet* 1917;189:867–72.
28. Tatu L, Bogousslavsky J, Moulin T, et al. The “torpillage” neurologists of World War I electric therapy to send hysterics back to the front. *Neurology* 2010;75:279–83.
29. Khalil T, Abdel-Moty E, Asfour S, et al. Functional electric stimulation in the reversal of conversion disorder paralysis. *Arch Phys Med Rehabil* 1988;69:545–7.
30. Fishbain D, Goldberg M, Khalil T, et al. The utility of electromyographic biofeedback in the treatment of conversion paralysis. *Am J Psychiatry* 1988;145:1572.
31. Pollak TA, Nicholson TR, Edwards MJ, et al. A systematic review of transcranial magnetic stimulation in the treatment of functional (conversion) neurological symptoms. *J Neurol Neurosurg Psychiatry* 2014;85:191–7.
32. Moene FC, Spinhoven P, Hoogduin KA, et al. A randomized controlled clinical trial of a hypnosis-based treatment for patients with conversion disorder, motor type. *Int J Clin Exp Hypn* 2003;51:29–50.
33. Stone J, Hoeritzauer I, Brown K, et al. Therapeutic sedation for functional (psychogenic) neurological symptoms. *J Psychosom Res* 2014;76:165–8.
34. Garcin B, Roze E, Mesrati F, et al. Transcranial magnetic stimulation as an efficient treatment for psychogenic movement disorders. *J Neurol Neurosurg Psychiatry* 2013;84:1043–6.
35. Ferrara J, Stamey W, Strutt AM, et al. Transcutaneous electrical stimulation (TENS) for psychogenic movement disorders. *J Neuropsychiatry Clin Neurosci* 2011;23:141–8.
36. Moene FC, Spinhoven P, Hoogduin KA, et al. A randomised controlled clinical trial on the additional effect of hypnosis in a comprehensive treatment programme for in-patients with conversion disorder of the motor type. *Psychother Psychosom* 2002;71:66–76.

37. Ness D. Physical therapy management for conversion disorder: case series. *J Neurol Phys Ther* 2007;31:30–9.
38. Speed J. Behavioral management of conversion disorder: retrospective study. *Arch Phys Med Rehabil* 1996;77:147–54.
39. Trieschmann R, Stolov W, Montgomery E. An approach to the treatment of abnormal ambulation resulting from conversion reaction. *Arch Phys Med Rehabil* 1970;51:198–206.
40. Parees I, Saifee TA, Kassavetis P, et al. Believing is perceiving: mismatch between self-report and actigraphy in psychogenic tremor. *Brain* 2012;135:117–23.
41. Shapiro AP, Teasell RW. Behavioural interventions in the rehabilitation of acute v. chronic non-organic (conversion/factitious) motor disorders. *Br J Psychiatry* 2004;185:140–6.
42. Edwards MJ, Alonso-Canovas A, Schrag A, et al. Limb amputations in fixed dystonia: a form of body integrity identity disorder? *Mov Disord* 2011;26:1410–4.
43. Health Improvement Scotland. Stepped care for functional neurological symptoms. Edinburgh 2012.  
[http://www.healthcareimprovementscotland.org/our\\_work/long\\_term\\_conditions/neurological\\_health\\_services/neurological\\_symptoms\\_report.aspx](http://www.healthcareimprovementscotland.org/our_work/long_term_conditions/neurological_health_services/neurological_symptoms_report.aspx) (date accessed 17 Jul 2014).
44. National Institute for Health and Care Excellence (NICE). Low back pain: Early management of persistent non-specific low back pain. NICE clinical guideline 88. London 2009.  
<http://www.nice.org.uk/guidance/CG88> (date accessed 17 Jul 2014).
45. Deaton AV. Treating conversion disorders: Is a pediatric rehabilitation hospital the place? *Rehabil Psychol* 1998;43:56–62.
46. Watanabe TK, O’Dell MW, Togliatti TJ. Diagnosis and rehabilitation strategies for patients with hysterical hemiparesis: a report of four cases. *Arch Phys Med Rehabil* 1998;79:709–14.
47. Sharpe M, Walker J, Williams C, et al. Guided self-help for functional (psychogenic) symptoms: a randomized controlled efficacy trial. *Neurology* 2011;77:564–72.
48. Hinson VK, Cubo E, Comella CL, et al. Rating scale for psychogenic movement disorders: scale development and clinimetric testing. *Mov Disord* 2005;20:1592–7.
49. McCormack R, Moriarty J, Mellers JD, et al. Specialist inpatient treatment for severe motor conversion disorder: a retrospective comparative study. *J Neurol Neurosurg Psychiatry* 2013;85:895–900.

Tabla 1 Conjunto de mecanismos y factores etiológicos potenciales en pacientes con trastornos motores funcionales

| Factores                                                                   | Biológicos                                                                                                                                                                                                                                                                                                                      | Psicológicos                                                                                                                                                                                                                                                                                                                  | Sociales                                                                                                                                                                                                                                                                                                                                                                                    |
|----------------------------------------------------------------------------|---------------------------------------------------------------------------------------------------------------------------------------------------------------------------------------------------------------------------------------------------------------------------------------------------------------------------------|-------------------------------------------------------------------------------------------------------------------------------------------------------------------------------------------------------------------------------------------------------------------------------------------------------------------------------|---------------------------------------------------------------------------------------------------------------------------------------------------------------------------------------------------------------------------------------------------------------------------------------------------------------------------------------------------------------------------------------------|
| Factores que actúan en todas las etapas<br>Vulnerabilidades predisponentes | <ul style="list-style-type: none"> <li>▶ Enfermedad “orgánica”</li> <li>▶ Historia de síntomas funcionales previos</li> <li>▶ Factores genéticos que afectan a la personalidad</li> <li>▶ Vulnerabilidades biológicas del sistema nervioso</li> </ul>                                                                           | <ul style="list-style-type: none"> <li>▶ Trastorno emocional</li> <li>▶ Trastorno de personalidad</li> <li>▶ Percepción de experiencias adversas en la infancia</li> <li>▶ Rasgos de personalidad</li> <li>▶ Falta de apego/forma de afrontamiento</li> </ul>                                                                 | <ul style="list-style-type: none"> <li>▶ Problemas socio económicos</li> <li>▶ Acontecimientos vitales y dificultades</li> <li>▶ Negligencia/abuso infantil</li> <li>▶ Problemas en la dinámica familiar</li> <li>▶ Copia de los síntomas de otros</li> </ul>                                                                                                                               |
| Mecanismos precipitantes                                                   | <ul style="list-style-type: none"> <li>▶ Estado o acontecimiento fisiológico anormal (p.e, efecto secundario de medicamentos, hiperventilación, privación de sueño, parálisis del sueño)</li> <li>▶ Daño físico/dolor</li> </ul>                                                                                                | <ul style="list-style-type: none"> <li>▶ Percepción de acontecimientos vitales como negativos o inesperados</li> <li>▶ Episodio agudo de disociación/ataque de pánico</li> </ul>                                                                                                                                              |                                                                                                                                                                                                                                                                                                                                                                                             |
| Factores perpetuantes                                                      | <ul style="list-style-type: none"> <li>▶ Plasticidad de los circuitos motores y sensitivos (incluyendo dolor) del SNC que facilitan la aparición de movimientos anormales</li> <li>▶ Descondicionamiento</li> <li>▶ Anormalidades neuroendocrinas o inmunológicas parecidos a los que se ven en depresión y ansiedad</li> </ul> | <ul style="list-style-type: none"> <li>▶ Creencias sobre la enfermedad (paciente y familia)</li> <li>▶ Percepción de los síntomas como irreversibles</li> <li>▶ Sentirse no creídos</li> <li>▶ Percepción de que el movimiento causa daño</li> <li>▶ Evitar la provocación de los síntomas</li> <li>▶ Miedo a caer</li> </ul> | <ul style="list-style-type: none"> <li>▶ Beneficios sociales derivados de la enfermedad</li> <li>▶ Disponibilidad de compensación legal</li> <li>▶ Pruebas médicas pendientes o incertidumbre</li> <li>▶ Dependencia excesiva en fuentes de información o afiliaciones grupales que refuerzan la creencia de que los síntomas son irreversibles y de naturaleza puramente física</li> </ul> |

Adaptado de Stone y Carson.<sup>13</sup>  
SNC, sistema nervioso central

Tabla 2 Principios generales del tratamiento con fisioterapia para los TMF

- ▶ Crear confianza antes de retar/presionar al paciente.
- ▶ Proyectar confianza dejando claro que el fisioterapeuta está familiarizado con los TMF.
- ▶ Crear expectativas de mejoría.
- ▶ Comunicación abierta y consistente entre el equipo multidisciplinar y el paciente.
- ▶ Involucrar a la familia y cuidadores en el tratamiento.
- ▶ Limitar el tratamiento tocando al paciente. Al manejar al paciente, mejor facilitar que sujetar.
- ▶ Alentar el soporte temprano de peso. En la debilidad funcional la fuerza muscular explorada en la camilla a menudo no se correlaciona con la capacidad para mantenerse de pie.
- ▶ Fomentar la independencia y el autocuidado.
- ▶ Rehabilitación dirigida al objetivo centrándose en la función y el movimiento automático (por ejemplo, caminar) en vez de centrarse en la discapacidad (por ejemplo, la debilidad) y en el movimiento contralado (“que requiere atención completa”) (por ejemplo, ejercicios de estiramiento).
- ▶ Minimizar el refuerzo de patrones de movimientos y posturas maladaptativas.
- ▶ Evitar el uso de equipamiento adaptativo y apoyos para la movilidad (a pesar de que éstos no están siempre contraindicados).
- ▶ Evitar el uso de férulas y dispositivos para inmovilizar articulaciones.
- ▶ Reconocer y desafiar pensamientos y conductas no beneficiosas.
- ▶ Desarrollar un plan de autocuidado y prevención de recaídas.

Tabla 3 Ejemplos de cómo hablar a los pacientes

| INGREDIENTE                                                      | EJEMPLO                                                                                                                                                                                                                                                                                                                                                                                                                                                                                                                                                                                                                                                                                                                                                                                                                                                                                                                                      |
|------------------------------------------------------------------|----------------------------------------------------------------------------------------------------------------------------------------------------------------------------------------------------------------------------------------------------------------------------------------------------------------------------------------------------------------------------------------------------------------------------------------------------------------------------------------------------------------------------------------------------------------------------------------------------------------------------------------------------------------------------------------------------------------------------------------------------------------------------------------------------------------------------------------------------------------------------------------------------------------------------------------------|
| <b>Explicación del diagnóstico</b>                               |                                                                                                                                                                                                                                                                                                                                                                                                                                                                                                                                                                                                                                                                                                                                                                                                                                                                                                                                              |
| Explicar lo que tienen...                                        | “Tienes una parálisis funcional”<br>“Tienes un temblor funcional”                                                                                                                                                                                                                                                                                                                                                                                                                                                                                                                                                                                                                                                                                                                                                                                                                                                                            |
| Enfatizar en los mecanismos de los síntomas más que en la causa  | Debilidad – “Tu sistema nervioso no está funcionando adecuadamente pero no está dañado. Hay un problema con el modo en que tu cerebro envía mensajes a tu brazo/pierna.”<br>Temblor – “Has perdido el control sobre el brazo/pierna. Es por ello que se mueve sola.”                                                                                                                                                                                                                                                                                                                                                                                                                                                                                                                                                                                                                                                                         |
| Explicar cómo se hace el diagnóstico                             | Debilidad – Signo de Hoover “Puedo sentir como mientras estás intentando empujar tu pierna hacia el suelo, ésta está débil, de hecho cuanto más lo intentas, más débil se vuelve. Pero cuando intentas levantar la otra pierna, ¿sientes cómo el movimiento es más normal? La pierna afectada funciona mejor cuando mueves tu pierna buena. Esto lo que me dice es que tu cerebro está teniendo dificultades para enviar el mensaje a la pierna pero que el problema mejora cuando estás distraída intentando mover la otra pierna. Esto también nos enseña que la debilidad no se debe a un daño.”<br>Temblor – Alteración del temblor usando movimientos contralaterales “Cuando estás intentando copiar el movimiento con tu mano buena, ¿ves cómo el temblor en tu mano afecta mejora? Esto es típico del temblor funcional.” O “¿Ves cómo es de difícil copiar este movimiento con la mano buena? Esto es típico del temblor funcional. |
| Explicar lo que no tienen y por qué                              | “No tienes esclerosis múltiple, epilepsia, etc.”                                                                                                                                                                                                                                                                                                                                                                                                                                                                                                                                                                                                                                                                                                                                                                                                                                                                                             |
| Indicar que les crees                                            | “Yo te creo. No creo que te estés imaginando ni inventado tus síntomas o que estés loco.”                                                                                                                                                                                                                                                                                                                                                                                                                                                                                                                                                                                                                                                                                                                                                                                                                                                    |
| Enfatizar que son comunes                                        | “Veo muchos pacientes con síntomas similares.”                                                                                                                                                                                                                                                                                                                                                                                                                                                                                                                                                                                                                                                                                                                                                                                                                                                                                               |
| Enfatizar en la reversibilidad                                   | “Dado que no existe daño, tienes el potencial de poder mejorar. Tus signos físicos me lo muestran.”                                                                                                                                                                                                                                                                                                                                                                                                                                                                                                                                                                                                                                                                                                                                                                                                                                          |
| Enfatizar en que la autoayuda es una parte esencial para mejorar | “Esto no es tu culpa pero sí hay cosas que puedes hacer para ayudar a que mejores.”                                                                                                                                                                                                                                                                                                                                                                                                                                                                                                                                                                                                                                                                                                                                                                                                                                                          |
| Metáforas que pueden ser útiles                                  | “El hardware está bien pero existe un problema (reversible) con el software.”                                                                                                                                                                                                                                                                                                                                                                                                                                                                                                                                                                                                                                                                                                                                                                                                                                                                |
| Introducir el papel de la depresión/ansiedad                     | “Si te has estado sintiendo triste o depresivo, esto tiende a empeorar tus síntomas (a menudo es más fácil hablar de ello en una segunda visita).                                                                                                                                                                                                                                                                                                                                                                                                                                                                                                                                                                                                                                                                                                                                                                                            |
| Involucrar a la familia y a los amigos                           | Explícale todo a ellos también.                                                                                                                                                                                                                                                                                                                                                                                                                                                                                                                                                                                                                                                                                                                                                                                                                                                                                                              |
| <b>Durante la sesión de fisioterapia</b>                         |                                                                                                                                                                                                                                                                                                                                                                                                                                                                                                                                                                                                                                                                                                                                                                                                                                                                                                                                              |
| Preguntar a un paciente muy inmóvil que se levante               | “Sé que puede sonar extraño porque no puedes mover tus piernas pero creemos que merece la pena que intentes ponerte de pie. Queremos                                                                                                                                                                                                                                                                                                                                                                                                                                                                                                                                                                                                                                                                                                                                                                                                         |

|                                                                                                                                                                                   |                                                                                                                                                                                                                                                                                                                                                                                                                                                      |
|-----------------------------------------------------------------------------------------------------------------------------------------------------------------------------------|------------------------------------------------------------------------------------------------------------------------------------------------------------------------------------------------------------------------------------------------------------------------------------------------------------------------------------------------------------------------------------------------------------------------------------------------------|
|                                                                                                                                                                                   | potenciar movimientos automáticos que sabemos que están ahí pero a los cuales no puedes acceder. Mira hacia delante y hacia mi...”                                                                                                                                                                                                                                                                                                                   |
| Preguntar a un paciente con problemas en la marcha que ande más rápido o hacia atrás                                                                                              | “Sé que puede sonar extraño pero una forma de potenciar el movimiento automático es intentar moverse a diferentes velocidades. Andar más rápido o hacia atrás implica “programas” diferentes en el cerebro que pueden que no estén afectados por tu problema.”                                                                                                                                                                                       |
| <b>Dando el alta al paciente</b>                                                                                                                                                  |                                                                                                                                                                                                                                                                                                                                                                                                                                                      |
| A el paciente que está enfadado o no cree en el diagnóstico                                                                                                                       | “Por nuestra experiencia sabemos que los tratamientos que estamos usando no son efectivos cuando los pacientes sienten que no entienden que es lo que no está funcionando en ellos. Tener confianza en el diagnóstico no hace que el movimiento vuelva a ser normal, pero la fisioterapia no funcionará si no se comienza con algo de confianza.”<br>“El problema aquí es que yo si te creo, pero me temo que eres tú el que no me crees realmente.” |
| A el paciente que tiene cierta confianza en el diagnóstico, ha realizado de manera adecuada el tratamiento pero que no ha mejorado debido a factores perpetuantes inquebrantables | “Has trabajado realmente duro en estas sesiones y espero que estés de acuerdo en que yo también lo he hecho. Siento no haber podido ser de ayuda. No creo que más tratamiento por mi parte sea útil en estos momentos. Recuerda que con tu diagnóstico existe siempre el potencial de mejorar en etapas posteriores.”                                                                                                                                |

Tabla 4. Signos clínicos que pueden mostrarse en un paciente con trastorno motor funcional para demostrar el diagnóstico y el potencial para reversibilidad y ejemplos de cómo discutirlo con los pacientes

|                                                                                                                                                                                                                                                          |                                                                                                                                                                                                                                                                                                                                                                                                                                                                                                                                                                                           |
|----------------------------------------------------------------------------------------------------------------------------------------------------------------------------------------------------------------------------------------------------------|-------------------------------------------------------------------------------------------------------------------------------------------------------------------------------------------------------------------------------------------------------------------------------------------------------------------------------------------------------------------------------------------------------------------------------------------------------------------------------------------------------------------------------------------------------------------------------------------|
| <p>Signo de Hoover<br/>Debilidad de la extensión de la cadera que se normaliza con la flexión de la cadera contralateral contra resistencia</p>                                                                                                          | <p>“Puedo ver que cuando estás intentando empujar la pierna hacia el suelo está débil. De hecho, cuando más lo intentas más débil se vuelve. Pero cuando estás levantando la otra pierna, ¿puedes sentir que el movimiento en tu pierna mala se normaliza? Tu pierna afectada funciona mejor cuando mueves tu pierna buena. Esto refleja que tu cerebro tiene dificultades para enviar mensajes a la pierna pero que el problema mejora cuando estás distraído e intentas mover tu otra pierna. Esto también nos muestra que la debilidad debe ser reversible/no causada por un daño”</p> |
| <p>Signo del abductor de la cadera<br/>Debilidad de la abducción de la cadera que se normaliza con la abducción de la cadera contralateral contra resistencia</p>                                                                                        | <p>Similar al signo de Hoover</p>                                                                                                                                                                                                                                                                                                                                                                                                                                                                                                                                                         |
| <p>Distracción y “arrastre” del temblor<br/>Detener el temblor pidiéndole al paciente que copie movimientos rítmicos o genere movimientos balísticos con la extremidad contralateral (golpear el dedo índice con el pulgar a diferentes velocidades)</p> | <p>“Cuando tratas de copiar el movimiento con tu mano buena, ¿puedes ver que el temblor en tu mano afecta mejora? Eso es típico del temblor funcional.</p>                                                                                                                                                                                                                                                                                                                                                                                                                                |

Tabla 5 Ejemplo de técnicas para normalizar el movimiento en cada síntoma específico

| Síntoma                                     | Estrategia de Movimiento                                                                                                                                                                                                                                                                                                                                                                                                                                                                                                                                                                                                                                                    |
|---------------------------------------------|-----------------------------------------------------------------------------------------------------------------------------------------------------------------------------------------------------------------------------------------------------------------------------------------------------------------------------------------------------------------------------------------------------------------------------------------------------------------------------------------------------------------------------------------------------------------------------------------------------------------------------------------------------------------------------|
| <p>Debilidad de la pierna</p>               | <p>Soportar peso pronto, cada vez con menos apoyo sobre las extremidades superiores, por ejemplo apoyo con la “punta de los dedos”, evitar que el paciente soporte peso mediante apoyos para la marcha/superficies de soporte<br/>Levantarse en un ambiente seguro con balanceo de lado a lado<br/>Gatear con 4 puntos de soporte y luego con las dos rodillas<br/>Caminar en una cinta de correr (con o sin arneses para soportar el peso corporal y el retroalimentación de un espejo)</p>                                                                                                                                                                                |
| <p>Debilidad del tobillo</p>                | <p>Provoca la dorsiflexión del tobillo pidiéndole al paciente que camine hacia atrás, con balanceo hacia adelante y atrás del cuerpo mientras se mantiene en bipedestación o pidiéndole al paciente que camine arrastrando sus pies, manteniendo la superficie plantar de cada pie en contacto con el suelo.<br/>Utilizar electroestimulación muscular.</p>                                                                                                                                                                                                                                                                                                                 |
| <p>Debilidad de extremidades superiores</p> | <p>Provocar actividad muscular en extremidades superiores pidiéndole al paciente que soporte peso a través de sus manos (por ejemplo, arrodillarse con 4 puntos de soporte, o mantenerse de pie con las manos descansando sobre una mesa) aguantar peso mientras se balancea o gatea<br/>Minimizar el desuso mantenido utilizando la extremidad superior afecta para estabilizar objetos durante tareas, por ejemplo, estabilizar el papel mientras escribe, el plato mientras come<br/>Practicar tareas que son familiares o importantes para el individuo, que pueden no estar asociadas con los síntomas por ejemplo, el uso del teléfono móvil, ordenador o tableta</p> |

|                                           |                                                                                                                                                                                                                                                                                                                                                                                                                                                                                                                                                                                                                                                                                                                                                                                                                                                                                                                                                                                                                                                                                                                                                                              |
|-------------------------------------------|------------------------------------------------------------------------------------------------------------------------------------------------------------------------------------------------------------------------------------------------------------------------------------------------------------------------------------------------------------------------------------------------------------------------------------------------------------------------------------------------------------------------------------------------------------------------------------------------------------------------------------------------------------------------------------------------------------------------------------------------------------------------------------------------------------------------------------------------------------------------------------------------------------------------------------------------------------------------------------------------------------------------------------------------------------------------------------------------------------------------------------------------------------------------------|
|                                           | <p>Estimular respuestas posturales automáticas de las extremidades superiores sentándose en una superficie inestable como la terapia con balón, apoyando las manos en la superficie de apoyo</p>                                                                                                                                                                                                                                                                                                                                                                                                                                                                                                                                                                                                                                                                                                                                                                                                                                                                                                                                                                             |
| <p>Trastorno de la marcha</p>             | <p>Acelerar la marcha (en algunos casos puede empeorar el patrón de la marcha)<br/> Disminuir la velocidad de la marcha<br/> Caminar arrastrando los pies hacia adelante, manteniendo la superficie plantar del pie en contacto con el suelo (como si estuviera esquiando).<br/> Progresar hacia una marcha normal en pasos graduales.<br/> Crear un patrón de marcha normal a partir de los componentes sencillos y factibles que progresivamente se aproximen a una marcha normal. Por ejemplo – balanceo del peso corporal de lado a lado, continuar con el balanceo permitiendo que uno de los pies se adelante poco a poco “automáticamente”, incrementar de forma progresiva la longitud del paso manteniendo el foco de atención en el balanceo rítmico del cuerpo más que en la acción de dar el paso.<br/> Caminar aguantando en cada mano pesos/pesas pequeñas<br/> Caminar hacia atrás o de lado<br/> Caminar a un cierto ritmo (por ejemplo al ritmo de una música, contando: 1,2,1,2...)<br/> Movimientos exagerados (por ejemplo, caminando con pasos altos)<br/> Subir y bajar escaleras (esto es, a menudo, más fácil que caminar en superficies planas)</p> |
| <p>Temblor en extremidades superiores</p> | <p>Realizar el movimiento “voluntario” imitando activamente el temblor, cambiar el movimiento a una amplitud mayor y disminuir la frecuencia, luego enlentecer el movimiento hasta mantener una postura quieta<br/> Enseña al paciente cómo relajar los músculos contrayendo activamente sus músculos durante unos pocos segundos y luego relajando<br/> Cambiar posturas habituales y movimientos que faciliten la producción del temblor<br/> Realizar un movimiento competitivo, por ejemplo aplaudir a un ritmo o un movimiento amplio y fluido con la mano sintomática como si se dirigiera una orquesta<br/> Focalizarse en otra parte del cuerpo, por ejemplo realizar golpes pequeños repetitivos con la otra mano o pie<br/> Ejercicios de relajación muscular. Por ejemplo, técnicas de relajación muscular progresiva, biofeedback con EMG desde el trapecio o usando retroalimentación con espejos</p>                                                                                                                                                                                                                                                           |
| <p>Temblor en extremidades inferiores</p> | <p>Balanceo del peso corporal de lado a lado o hacia adelante y atrás. Cuando el temblor ha disminuido, balancear progresivamente hasta alcanzar una postura quieta<br/> Movimientos competitivos tales como pequeños golpes repetitivos con la punta del pie<br/> Asegurar la distribución correcta del peso corporal incluso en bipedestación. Esto puede ser conseguirse usando balanzas o retroalimentación con espejos<br/> Cambiar posturas que facilitan la producción de los síntomas. Por ejemplo, reducir apoyar el peso corporal sobre el antepie.</p>                                                                                                                                                                                                                                                                                                                                                                                                                                                                                                                                                                                                            |
| <p>Distonía fija</p>                      | <p>Cambiar las posturas habituales adoptadas para sentarse y levantarse para prevenir periodos largos con las articulaciones forzadas y promover posturas con alineamiento<br/> Normalizar patrones motores (por ejemplo, levantarse desde una silla, transferencias, caminar) con un foco de atención externo o alterado (no la</p>                                                                                                                                                                                                                                                                                                                                                                                                                                                                                                                                                                                                                                                                                                                                                                                                                                         |



|                                 |                                                                                                                                                                                                                                                                                                                                                                                                                                                                                                                                                                                                                                                                                                                                                                                                                                                                                                                                                                                                                                                                                                                                          |
|---------------------------------|------------------------------------------------------------------------------------------------------------------------------------------------------------------------------------------------------------------------------------------------------------------------------------------------------------------------------------------------------------------------------------------------------------------------------------------------------------------------------------------------------------------------------------------------------------------------------------------------------------------------------------------------------------------------------------------------------------------------------------------------------------------------------------------------------------------------------------------------------------------------------------------------------------------------------------------------------------------------------------------------------------------------------------------------------------------------------------------------------------------------------------------|
|                                 | <p>extremidad distónica)</p> <p>Desaprobar conductas de evitación que no son beneficiosas y alentar experiencias sensitivas normales (por ejemplo, usar calcetines y zapatos, soporte del peso corporal si es tolerado, no mantener el brazo en una postura de “protección”)</p> <p>Prevenir o abordar la hipersensibilidad y la hipervigilancia</p> <p>Enseñar estrategias para relajar los músculos hiperactivos al sentarse y acostarse (por ejemplo, permitiendo a la superficie de apoyo soportar el peso de la extremidad. Cojines o toallas dobladas pueden ser necesarias para elevar la superficie de soporte y que toque la extremidad si existen contracturas)</p> <p>El paciente puede necesitar que le enseñen cómo ser consciente de posturas maladaptativas o de los músculos hiperactivos para poder usar las estrategias</p> <p>Considerar el examen bajo anestesia, especialmente si la extremidad está completamente fija o hay sospecha de contracturas</p> <p>Considerar un ensayo con electroestimulación muscular o electroestimulación funcional para normalizar la postura y el movimiento de la extremidad</p> |
| Espasmos/Mioclónías funcionales | <p>Reentrenar el movimiento puede que sea menos útil para los movimientos de espasmos intermitentes o abruptos. En cambio, busca alterar la atención sobre uno mismo o los síntomas premonitorios a la sacudida mediante la distracción o redirigiendo la atención</p> <p>Abordar el dolor, la hiperactividad de los músculos o los patrones alterados de movimiento que pueden preceder a la sacudida</p>                                                                                                                                                                                                                                                                                                                                                                                                                                                                                                                                                                                                                                                                                                                               |
| EMG, electromiografía           |                                                                                                                                                                                                                                                                                                                                                                                                                                                                                                                                                                                                                                                                                                                                                                                                                                                                                                                                                                                                                                                                                                                                          |

| Tabla 6. Medidas de resultados útiles                                                                                                                                                                                                                                                                                                                                 |
|-----------------------------------------------------------------------------------------------------------------------------------------------------------------------------------------------------------------------------------------------------------------------------------------------------------------------------------------------------------------------|
| Medidas de resultados físicos                                                                                                                                                                                                                                                                                                                                         |
| <ul style="list-style-type: none"> <li>▶ Escala de Movilidad Funcional<sup>1</sup></li> <li>▶ Escala de Equilibrio de Berg</li> <li>▶ Caminar 10 metros cronometrados</li> <li>▶ Medida de Independencia Funcional<sup>37 38 45 46</sup></li> <li>▶ Escala de Rankin Modificada<sup>49</sup></li> </ul>                                                               |
| Medidas de Resultados Reportadas por el Paciente                                                                                                                                                                                                                                                                                                                      |
| <ul style="list-style-type: none"> <li>▶ Escala de Impresión Clínica Global<sup>47 49</sup></li> <li>▶ Versión Corta 36 / Versión Corta 12<sup>47</sup></li> <li>▶ Cuestionario de Percepción de Enfermedad (IPQ) / IPQ breve<sup>47</sup></li> <li>▶ Escala de Depresión y Ansiedad Hospitalaria<sup>5</sup></li> <li>▶ Escala de Ajuste Laboral y Social</li> </ul> |
| Medidas de Resultados usadas en Investigación                                                                                                                                                                                                                                                                                                                         |
| <ul style="list-style-type: none"> <li>▶ Escala de Valoración de Trastornos del Movimiento Psicógenos<sup>21 48</sup></li> <li>▶ Escala de Valoración mediante Vídeo para Síntomas Motores Conversivos<sup>36</sup></li> </ul>                                                                                                                                        |
